# Supplementary material
Source: PubMed Central journal article supplement (PMC1764042)
Supplement: pcbi.0020163.sg002.pdf [file pcbi.0020163.sg002.pdf]

# Supplementary Figure S2.

## **Rhizobiaceae, Mesorhizobiaceae, Bartonellaceae, Brucellales (7 out of 8 species)**

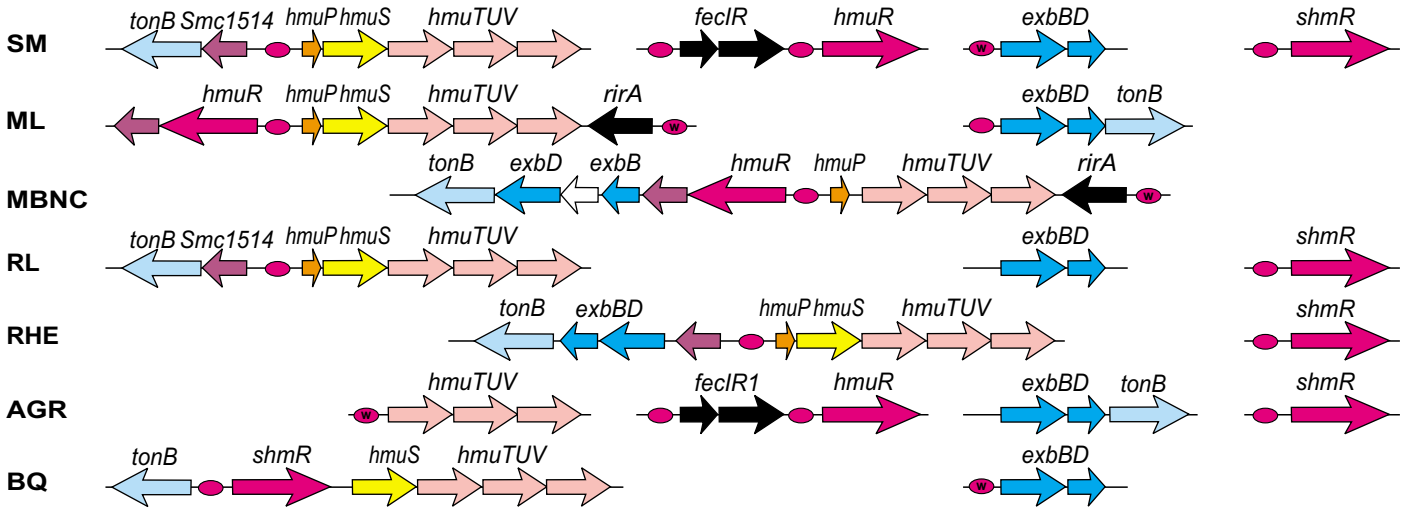

## **Bradyrhizobiaceae (3 out of 5 species)**

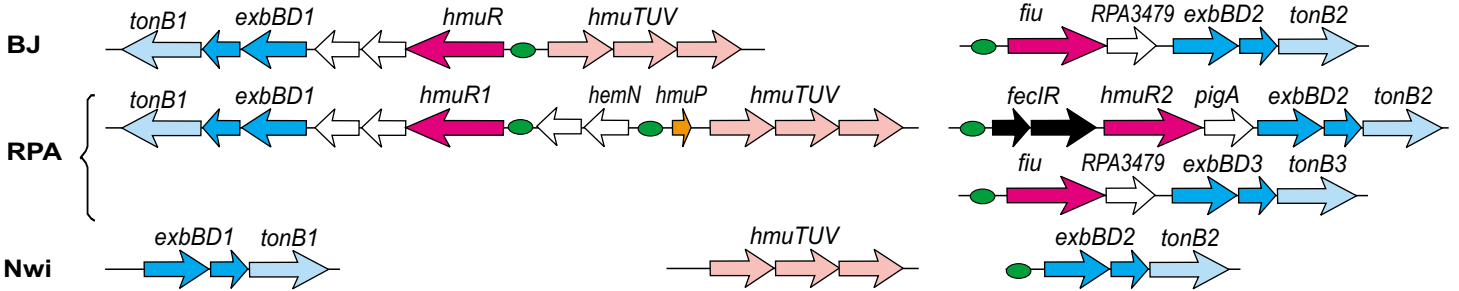

## **Rhodobacteraceae (9 out of 12 species)**

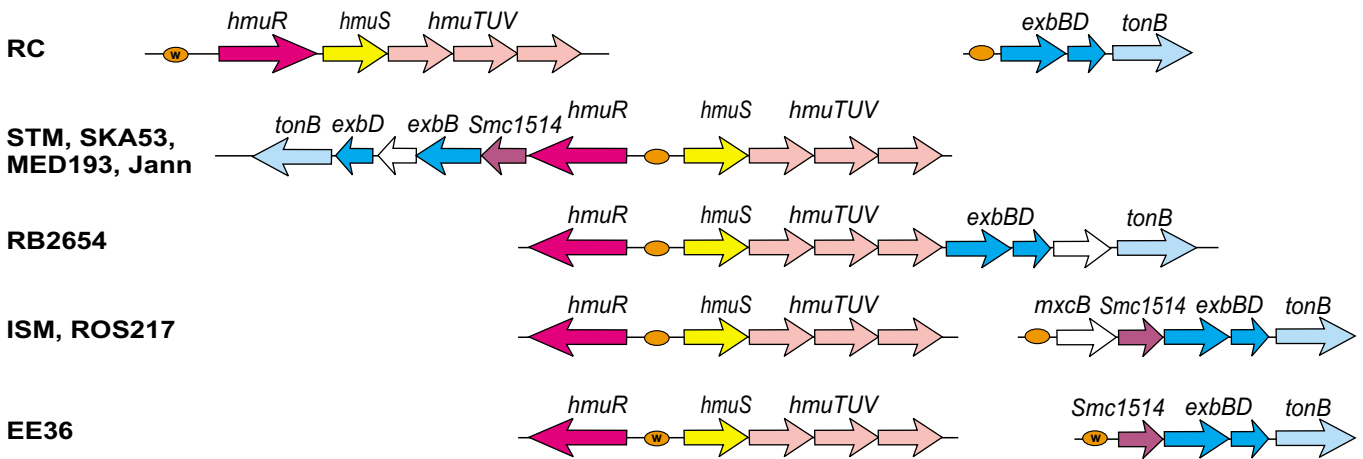

## **Other $\alpha$ -proteobacteria (1 out of 12 species)**

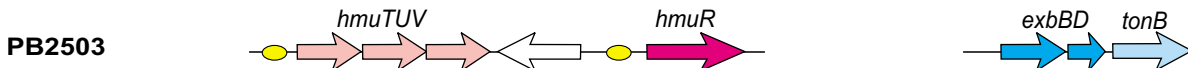

BME, Brad, Nham, Rsph, SPO, OB2597, PU1002, OA2633, CC, ELI, Sala, Saro, ZM, GOX, Rrub, Amb, Magn - **no *hmu* genes**

**Iron Regulatory sites:** ● RirA-box    ● Iron-Rhodo-box    ● Irr-box (ICE)    ● Fur<sup>α</sup>-box

Weak sites with score below the threshold are marked by 'w'.  
Homologous genes and groups of genes are marked by matching colors.  
Genome abbreviations are described in Figure 1.
