# Supplementary material
Source: PubMed Central journal article supplement (PMC1764042)
Supplement: pcbi.0020163.st001.pdf [file pcbi.0020163.st001.pdf]

Suppl. Table S1. The RirA regulon in alpha-proteobacteria

| Locus ID                                                         | Operon                   | Position | Score | RirA-box             | Function                                                                           |
|------------------------------------------------------------------|--------------------------|----------|-------|----------------------|------------------------------------------------------------------------------------|
| <b><i>Sinerhizobium meliloti</i></b>                             |                          |          |       |                      |                                                                                    |
| <i>SMc01657</i>                                                  | <i>fhuA2-fhuF-irp6A2</i> | -94      | 5.34  | CATGACTtaAAaAGTCATG  | ferrichrome iron receptor, ferric iron reductase, Ferrisiderophore-binding protein |
|                                                                  |                          | -51      | 4.01  | CATGAgTgaTtagcTCacc  |                                                                                    |
| <i>SMA2412</i>                                                   | <i>rhrA</i>              | -107     | 4.88  | CAaGACTATTtaAGTCATG  | transcriptional activator of rhizobactin biosynthesis and transport                |
| <i>SMA2414</i>                                                   | <i>rhtA-iucB(vbsA)</i>   | -80      | 4.88  | CATGACTtaAATAGTCtTG  | rhizobactin receptor, siderophore biosynthesis                                     |
| <i>SMc01747</i>                                                  | <i>hmuPSTUV</i>          | -134     | 4.82  | tATGAgTAaTgaAGTCAaG  | hemin ABC transporter                                                              |
| <i>SMc01514</i>                                                  | <i>SMc01514-tonB</i>     | -114     | 4.82  | CtTGACTtcAtTAcTCATa  | hypothetical protein, iron transport component TonB                                |
| <i>SMc02889</i>                                                  | <i>rhtX2 - viuA</i>      | -65      | 4.77  | CcTGAaTgcAATAGTCAaG  | ferrisiderophore permease and receptor                                             |
| <i>SMc00529</i>                                                  | <i>sufS2-sufBCDS1XA</i>  | -164     | 4.74  | CtTGACTAaAccAGTCAgc  | Fe-S cluster assembly                                                              |
| <i>SMc04203</i>                                                  | <i>fecl-fecR</i>         | -171     | 4.68  | CATGAtTATctcAaTCAac  | iron transport sigma factor and sensor                                             |
| <i>SMb21432</i>                                                  | <i>irp6A1-irp6BC</i>     | -58      | 4.68  | gtTGACcggTAaAGTCATG  | ferrisiderophore ABC transporter                                                   |
| <i>SMc00045</i>                                                  | <i>cycF-cycG</i>         | -183     | 4.57  | gATGAgTtcTATAtTCATa  | cytochrome c-556, diheme cytochrome c-type [heme]                                  |
| <i>SMA2337</i>                                                   | <i>rhtX-rhbABCDEF</i>    | -60      | 4.47  | gATGACggcAAcAcTCATG  | rhizobactin siderophore transporter, and biosynthesis genes                        |
| <i>SMc00592</i>                                                  |                          | -54      | 4.37  | CtTGACgATcAaAGTCAgc  | similar to AMP-dependent synthetase / ligase:Acyltransferase 3                     |
| <i>SMc02726</i>                                                  | <i>shmR</i>              | -140     | 4.26  | atTGACaATcAcAcTCATG  | hemin receptor                                                                     |
|                                                                  |                          | -53      | 3.84  | CtTGAgTtcgcccgcTCAac |                                                                                    |
| <i>SMc02727</i>                                                  |                          | -89      | 3.84  | gtTGAgcggcgaAcTCAaG  | hypothetical protein                                                               |
|                                                                  |                          | -2       | 4.26  | CATGAgTgTgATtGTCAat  |                                                                                    |
| <i>SMc04205</i>                                                  | <i>hmuR</i>              | -120     | 4.26  | tATGACatccgTttTCAaG  | heme receptor                                                                      |
| <i>SMc02085</i>                                                  | <i>exbB-exbD</i>         | -182     | 4.20  | CtTGAtTATTgTAcTCcac  | components for TonB-dependent iron transporters                                    |
| <i>SMc01611</i>                                                  | <i>fhuA1</i>             | -86      | 4.08  | gtTGAtctagAcAcTCATc  | ferrichrome iron receptor                                                          |
|                                                                  |                          | -62      | 4.19  | gtTGACagTAccgGTCACG  |                                                                                    |
| <i>SMA1746</i>                                                   | <i>fepBDGC-mxcB</i>      | -178     | 4.09  | CATGAaagcTtcgctCAac  | ferrierobactin ABC transporter, siderophore-interacting protein                    |
| <i>SMA1747</i>                                                   | <i>fhuA3</i>             | -103     | 4.09  | gtTGAgcgaAgcttTCATG  | ferrichrome iron receptor                                                          |
| <i>SMA1749</i>                                                   | <i>araX1</i>             | -115     | 4.01  | aATGAgAATAcgAGTCAac  | siderophore uptake AraC-type regulator                                             |
| <i>SMc00784</i>                                                  | <i>fbpA</i>              | -46      | 3.97  | tATGAtTgactaAGTtAaG  | ABC-type Fe <sup>3+</sup> transport system, periplasmic component                  |
| <i>SMc00785</i>                                                  | <i>rirA</i>              | -172     | 3.97  | CtTaACTtagtcAaTCATa  | iron-responsive regulator RirA                                                     |
| <i>SMc03787</i>                                                  | <i>bfd-bfr</i>           | -67      | 3.79  | gtTGACggcAAatGTCcTc  | bacterioferritin ferredoxin, bacterioferritin                                      |
| <b>Expression data: RirA-repressed genes (Chao et al., 2006)</b> |                          |          |       |                      |                                                                                    |
| <b><i>Mesorhizobium loti</i></b>                                 |                          |          |       |                      |                                                                                    |
| <i>msl1154</i>                                                   | <i>hmuPSTUV</i>          | -82      | 5.06  | CATGAtTATTcaAGTCAaG  | hemin ABC transporter                                                              |
| <i>mlr1155</i>                                                   | <i>hmuR-SMc01514</i>     | -84      | 5.06  | CtTGACTtgAATAaTCATG  | heme receptor, hypothetical protein                                                |
| <i>mlI4168</i>                                                   | <i>exbB-exbD-tonB</i>    | -83      | 4.99  | gtTGACTgTTgcAGTCATc  | components for TonB-dependent iron transporters                                    |
|                                                                  |                          | -58      | 4.89  | gtTGACTtgTATAcTCATG  |                                                                                    |
| <i>mlr3495</i>                                                   | <i>fbpABC</i>            | -68      | 4.80  | gtTGACTATTcgtGTCATG  | ferric cations ABC transporter                                                     |
| <i>mlI6832</i>                                                   |                          | -260     | 4.74  | CtTGAaTAaAtctaTCAaG  | hypothetical protein                                                               |
| <i>mlI5668</i>                                                   |                          | -57      | 4.72  | CtTGACTAaAAaAcTCAcc  | transcriptional regulator, ArsR family                                             |
| <i>mlI0429</i>                                                   |                          | -318     | 4.60  | CATGAtTcaAAaAcTCAac  | hypothetical protein                                                               |
| <i>mlr1147</i>                                                   | <i>rirA</i>              | -173     | 4.46  | gtTGACgAgAATaTTCATc  | iron-responsive regulator RirA                                                     |
| <i>mlr5523</i>                                                   | <i>irpA-bfd-bfr</i>      | -257     | 3.89  | gtTGACTtcTgTAGTttaG  | iron-regulated protein A, bacterioferritin ferredoxin, bacterioferritin            |

**Mesorhizobium sp. BNC1**

|              |                                 |      |             |                      |                                                                                   |
|--------------|---------------------------------|------|-------------|----------------------|-----------------------------------------------------------------------------------|
| MBNC03002200 | <i>hmuPTUV</i>                  | -84  | 4.86        | gtTGAtTATTgatGTCAaG  | hemin ABC transport system                                                        |
| MBNC03002201 | <i>hmuR-SMc01514-exbBD-tonB</i> | -172 | 4.86        | CtTGACatcAATAaTCAac  | Fe receptor, conserved protein, TonB-dependent transporter components             |
| MBNC03003078 | <i>bfd-bfr</i>                  | -183 | 4.79        | CATGACctTgAaAGTCAaG  | bacterioferritin ferredoxin, bacterioferritin                                     |
| MBNC03004224 | <i>fhuA-rhtX-mxcB</i>           | -148 | 4.78        | gtTGACatTgATAaTCATG  | ferrichrome iron receptor, MFS permease, siderophore-interacting protein          |
| MBNC03004482 | <i>chpA -X- ftr -COG0348</i>    | -183 | 4.70        | gtTGACctTTcaAGTCATG  | involved in high-affinity Fe transport, High-affinity Fe permease, Polyferredoxin |
| MBNC03003400 | <i>fbpAB</i>                    | -154 | <u>4.19</u> | CtTGACTAcTATAGTttaG  | ferric cations ABC transporter                                                    |
| MBNC03003363 | <i>fecB</i>                     | -75  | <u>4.09</u> | ggTGAtgtTgAcAGTCAaG  | iron(III) dicitrate-binding protein                                               |
|              |                                 | -29  | <u>4.06</u> | tcTGACcATgctTtGTCAaG |                                                                                   |
| MBNC03003364 | <i>fecCDE</i>                   | -91  | <u>4.06</u> | CtTGACaAgcATgGTCAga  | iron(III) dicitrate ABC transporter, permease subunits, ATPase                    |
|              |                                 | -45  | <u>4.09</u> | CtTGACTgTcAacaTCacc  |                                                                                   |
| MBNC03002196 | <i>rirA</i>                     | -136 | <u>3.60</u> | CtgGACctaTAgcGTCATc  | iron-responsive regulator RirA                                                    |

**Rhizobium leguminosarum**

|               |                         |      |             |                      |                                                                            |
|---------------|-------------------------|------|-------------|----------------------|----------------------------------------------------------------------------|
| pRL120322     | <i>fhuA1-fhuF</i>       | -19  | 5.10        | gATGACTAaAATAaTCATc  | ferrichrome iron receptor, ferric iron reductase                           |
| RL4584        | <i>fbpABC</i>           | -25  | 4.75        | tATGAaataTtTAGTCAaG  | ferric cations ABC transporter                                             |
| pRL100314     |                         | 6    | 4.72        | CATGACaAgAgcAcTCAaG  | hypothetical protein                                                       |
| RL3522        | <i>shmR</i>             | -178 | 4.71        | CATGAtagaTATAtTCAac  | hemin receptor                                                             |
|               |                         | -142 | 4.60        | gtTGACaATgctTAcTCATG |                                                                            |
| RL3695        | <i>SMc01514-tonB</i>    | -114 | 4.71        | CtTGACTtTctTAcTCATa  | conserved protein, iron transport component TonB                           |
| RL3696        | <i>hmuPSTUV</i>         | -81  | 4.71        | tATGAgTAagAaAGTCAaG  | hemin ABC transporter                                                      |
| RL2713        | <i>irp6ABC</i>          | -66  | 4.68        | CtTGATtcaTtaAGTCATa  | ferrisiderophore ABC transporter                                           |
| RL2583        | <i>sufS2-sufBCDS1XA</i> | -164 | 4.63        | CtTGACTAgTgTtGTCAgc  | Fe-S cluster assembly                                                      |
| pRL120319     | <i>rpol</i>             | -134 | <u>4.28</u> | CtTGACTccTgTtaTCacc  | iron transport sigma factor                                                |
| pRL120320     | <i>vbsC</i>             | -48  | <u>4.28</u> | ggTGAtaAcAggAGTCAaG  | vicibactin biosynthesis                                                    |
| pRL100328     | <i>fhuCDB</i>           | -63  | <u>4.09</u> | gtTGAtTgcccgtctTCATc | ferrichrome iron transporter                                               |
| pRL120713     | <i>btuFCD</i>           | -290 | <u>4.01</u> | gtTGAtTtgTtTgGTCTTG  | siderophore ABC transporter (SBP, permease) similar to B12 ABC transporter |
| pRL100325     | <i>fhuA2</i>            | -96  | <u>4.00</u> | gtTGACTccAATtcTCcTG  | ferrichrome iron receptor                                                  |
| 001_4255      | <i>fumC</i>             | -120 | <u>4.00</u> | CATGACTtccgattTCAat  | fumarate hydratase C                                                       |
| RL0777        | <i>rirA</i>             | -86  | <u>3.80</u> | gcTGAaTgCGAattTCATa  | iron-responsive regulator RirA                                             |
| pRL120315     | <i>vbsGSO</i>           | -88  | <u>3.98</u> | gAaGAaaAaAATtcTCATc  | vicibactin biosynthesis                                                    |
| pRL120316     | <i>vbsADL</i>           | -124 | <u>3.98</u> | gATGAgAATTtTtTCTcTc  | vicibactin biosynthesis                                                    |
| RL4696-RL4695 | <i>bfd-bfr</i>          | -128 | <u>3.59</u> | CtTGACagccAccaTCTcTc | bacterioferritin ferredoxin, bacterioferritin                              |
|               |                         | -97  | <u>3.56</u> | CACGAtagTcAgtGTCATG  |                                                                            |

**Experimental data: Fe-RirA-repressed operons (Yeoman et al., 2004; Todd et al., 2002; 2006)****Rhizobium etli**

|             |                            |      |             |                     |                                                              |
|-------------|----------------------------|------|-------------|---------------------|--------------------------------------------------------------|
| RHE_CH03076 | <i>shmR</i>                | -142 | 4.96        | gtTGACaAcAgaAGTCATG | hemin receptor                                               |
| RHE_CH03266 | <i>Smc01514-exbBD-tonB</i> | -117 | 4.71        | CtTGACTtTctTAcTCATa | conserved protein, components of TonB-dependent transporters |
| RHE_CH03267 | <i>hmuPSTUV</i>            | -79  | 4.71        | tATGAgTAagAaAGTCAaG | hemin ABC transporter                                        |
| RHE_CH04056 | <i>fbpABC</i>              | -69  | 4.66        | CtTGAaataggTAGTCAaG | ferric cations ABC transporter                               |
| RHE_CH02254 | <i>sufS2-sufBCDS1XA</i>    | -237 | <u>4.56</u> | CtTGACTAacgTtGTCAgc | Fe-S cluster assembly                                        |
| RHE_CH02383 | <i>fumC</i>                | -120 | <u>4.11</u> | CATGACTgTgATcaTCAat | fumarate hydratase C                                         |
| RHE_CH00735 | <i>rirA</i>                | -88  | <u>3.8</u>  | gcTGAaTgCGAattTCATa | iron-responsive regulator RirA                               |

**Agrobacterium tumefaciens**

|             |                                      |      |      |                      |                                                                    |
|-------------|--------------------------------------|------|------|----------------------|--------------------------------------------------------------------|
| AGR_L_2869  | <i>fecI1</i>                         | -132 | 5.04 | CtTGAtaATAATtGTCATG  | iron transport sigma factor and sensor                             |
| AGR_C_616   | <i>sssA</i>                          | -108 | 4.87 | CtTGAAaTgTAATtATCATG | hypothetical Fe-S scaffold protein                                 |
| AGR_pAT_635 | <i>mocC</i>                          | -2   | 4.80 | CATGAaTATTAcAGTCAcc  | myo-inositol 2-dehydrogenase                                       |
| AGR_C_720   | <i>araX</i>                          | -42  | 4.75 | CATGAaTAgaTtTtaTCATG | siderophore uptake AraC-type regulator                             |
| AGR_L_309   | <i>exsA</i>                          | -217 | 4.73 | CATGACatcAtcAtTCATc  | ATP-binding transport protein (EPS I biosynthesis)                 |
| AGR_C_1984  |                                      | 0    | 4.72 | CATGACTATcgatcTCAaG  | short chain dehydrogenase                                          |
| AGR_L_2862  | <i>irp6AABC</i>                      | -63  | 4.68 | CtTGACTAgTAcAGTCAga  | ferrisiderophore ABC transporter                                   |
| AGR_C_4156  | <i>shmR</i>                          | -105 | 4.76 | CATGAtTcaAAaAGTCATa  | hemin receptor                                                     |
|             |                                      | -78  | 4.52 | gtTGACagTgATcGTCATG  |                                                                    |
| AGR_C_344   | <i>rirA</i>                          | -145 | 4.62 | CtTGACTtgTtTgtTCATG  | iron-responsive regulator RirA                                     |
| AGR_C_346   | <i>fbpA2</i>                         | -2   | 4.62 | CATGAacAaAcaAGTCAaG  | ferric cations ABC transporter                                     |
| AGR_L_2323  | <i>AGR_L_2323-2304-viuA-fecBCI</i>   | -173 | 4.54 | CtTGAAaTcgctTAGTCAaG | siderophore biosynthesis, iron (III) dicitrate ABC transporter     |
| AGR_L_2326  | <i>AGR_L_2326-2334</i>               | -107 | 4.54 | CtTGACTAagcgAtTCAaG  | siderophore biosynthesis cluster                                   |
| AGR_L_2875  | <i>hmuR</i>                          | -270 | 4.44 | gtTGAgTAaTccgGTCAaG  | heme receptor                                                      |
| AGR_C_5028  | <i>bfd-bfr</i>                       | -70  | 4.39 | CtTGACatTTActGTCcTG  | bacterioferritin ferredoxin, bacterioferritin                      |
| AGR_C_3350  | <i>sufS2-sufBCDS1XA</i>              | 0    | 4.26 | CtTGACgAactgtGTCATc  | Fe-S cluster assembly                                              |
| AGR_L_1661  | <i>fhuADBC</i>                       | -61  | 4.24 | gATGACTtaAATtcTCcaG  | ferrichrome iron receptor, ABC transporter                         |
| AGR_C_715   | <i>fbpAB</i>                         | -28  | 4.21 | CtTGAtTtgcgccGTCATG  | ferric cations ABC transporter                                     |
| AGR_C_718   | <i>fhuA2</i>                         | -29  | 4.05 | CcTGAtgtaAAcAcTCATc  | ferrichrome iron receptor                                          |
| AGR_C_4467  | <i>hmuTUV</i>                        | -22  | 3.58 | CATGtgcAaAaAcTCAaG   | hemin ABC transporter                                              |
| AGR_pAT_442 | <i>fecI1R2-fhuA3-fepB-mxcB-fepDC</i> | -396 | 4.00 | gcTGAaTAcAgctaTCAaa  | ferrienterobactin ABC transporter, siderophore-interacting protein |
|             |                                      | -87  | 3.96 | CATGAgTtTTcTtTcTctac |                                                                    |
| AGR_L_2290  | <i>fecI1R3</i>                       | -218 | 4.26 | CATGAtaAaAATtGTCcTc  |                                                                    |
| AGR_C_4488  | <i>fatBDCE</i>                       | 10   | 3.83 | gcTGACagcgAacaTCAaG  | ferric anguibactin ABC transporter                                 |

**Brucella melitensis**

|           |                       |      |      |                      |                                                                |
|-----------|-----------------------|------|------|----------------------|----------------------------------------------------------------|
| BMEI0542  |                       | -132 | 4.92 | CATGAtTAacATAaTCATG  | hypothetical protein                                           |
| BMEI0543  |                       | -162 | 4.92 | CATGAtTATgtTAaTCATG  | choloylglycine hydrolase                                       |
| BMEI10105 | <i>OMP</i>            | -262 | 4.85 | tATGAaTgTATAGTCATc   | outer membrane iron receptor                                   |
| BMEI11051 | <i>fumC</i>           | -80  | 4.53 | CtTGACatTTATAtTCaca  | fumarate hydratase C                                           |
| BMEI0365  | <i>exbB-exbD-tonB</i> | -163 | 4.46 | CATGACTtgAAgtaTCATa  | components for TonB-dependent iron transporters                |
| BMEI10077 | <i>dhbCEBAD</i>       | -55  | 4.38 | CgTGACTggTtcttTCAaG  | 2,3-dihydroxybenzoic acid biosynthesis (brucebactin synthesis) |
| BMEI10584 | <i>fbpAB</i>          | -53  | 4.15 | CcTGAtccaTATAcTCATG  | ferric cations ABC transporter                                 |
| BMEI1042  | <i>sufBCDS1X</i>      | -160 | 4.03 | CtTGAaTttTaTtGgCAaa  | Fe-S cluster assembly                                          |
| BMEI10705 | <i>bfd-bfr</i>        | -344 | 4.00 | CATGgaTATTtaAcTCATa  | bacterioferritin ferredoxin, bacterioferritin                  |
| BMEI10707 | <i>rirA</i>           | -182 | 3.72 | ggTGAgAaAagggttTCATa | iron-responsive regulator RirA                                 |
| BMEI10607 | <i>fatBDCE</i>        | -88  | 3.49 | gtTGACTATAAagcaCAgG  | ferric anguibactin ABC transporter                             |

**Experimental data: Iron-responsive regulation (Bellaire et al., 2003)****Bartonella quintana**

|         |                         |      |      |                     |                                                 |
|---------|-------------------------|------|------|---------------------|-------------------------------------------------|
| BQ04160 | <i>shmR-hmuSTUV</i>     | -157 | 4.93 | CtTGACTgcTtTtaTCATG | hemin receptor and ABC transporter              |
| BQ04170 | <i>tonB</i>             | -101 | 4.93 | CATGAtaAaAgcAGTCAaG | components for TonB-dependent iron transporters |
| BQ02630 |                         | -53  | 4.65 | ttTGAaTtTTtaAtTCATG | Phage related lysozyme                          |
| BQ05940 | <i>sufS2-sufBCDS1XA</i> | -76  | 4.40 | ttTGAgTgcAtTttTCAaG | Fe-S cluster assembly                           |

|         |                  |      |             |                     |                                                 |
|---------|------------------|------|-------------|---------------------|-------------------------------------------------|
| BQ02420 | <i>hbpAB</i>     | -261 | <u>4.26</u> | CAGGACTcaTATtaTCATG | hemin binding proteins                          |
| BQ11710 | <i>exbB-exbD</i> | -342 | <u>4.05</u> | ttTGAtaAaAtcAaTCtTG | components for TonB-dependent iron transporters |
| BQ10310 | <i>fatDCE</i>    | -75  | <u>3.74</u> | CATGAaataAAgttTtAaG | ferric anguibactin ABC transporter              |
| BQ10300 | <i>fatBDCE</i>   | -35  | <u>3.44</u> | gATGAtcAaAtatcTgAaa | ferric anguibactin ABC transporter              |

**Color code for functional roles of genes:**

***Genes involved in iron uptake***

***Genes involved in iron storage***

***Genes involved in iron utilization pathways (synthesis of Fe-S, heme; iron-containing enzymes)***

***Transcription factors (rirA, araX, fecIR, irr)***

***Genes with other or uncertain functional roles***
