# Supplementary material
Source: PubMed Central journal article supplement (PMC1764042)
Supplement: pcbi.0020163.st002.pdf [file pcbi.0020163.st002.pdf]

Suppl. Table S2. The iron regulon in Rhodobacteraceae

| Locus ID                       | Operon                          | Position | Score       | Iron-Rhodo-box      | Function                                                                     |
|--------------------------------|---------------------------------|----------|-------------|---------------------|------------------------------------------------------------------------------|
| <b>Rhodobacter sphaeroides</b> |                                 |          |             |                     |                                                                              |
| RSP_6006                       | <i>hmuP-irpA -bfd-bfr</i>       | -199     | 4.53        | TCcGACTgATTcAGTCAcc | hemin uptake protein, iron-regulated protein A, ferredoxin, bacterioferritin |
| RSP_3416                       | <i>fecBCDE</i>                  | -156     | 4.43        | TCcGACTgtTcTtGTCgGA | iron(III) dicitrate ABC transporter                                          |
| RSP_3417                       | <i>OMP1</i>                     | -289     | 4.43        | TCcGACaAgAacAGTCgGA | TonB-dependent siderophore receptor                                          |
| RSP_2913                       | <i>fbpA</i>                     | -81      | 4.38        | gtTGACTgATagAcTCAGc | ferric cations ABC transporter                                               |
| RSP_1545                       | <i>RSP_1545-1544-1543</i>       | -64      | 4.33        | TCcGAtTgAAagAcTCgGg | thiol oxidoreductase, periplasmic protein, hypothetical protein              |
| RSP_0443                       | <i>iscR -sufSBCD</i>            | -120     | 4.22        | ctTGACaAAAacgcTCgGA | Fe-S cluster assembly                                                        |
| Rsph03003247                   | <i>fecI-fecR</i>                | -69      | 4.16        | gCcGAgcgATaTtGTCgGg | iron transport sigma factor and sensor                                       |
| RSP_0920                       | <i>exbB-exbD-tonB</i>           | -133     | <u>3.97</u> | ctTGACTgtTTTcGTaAac | components for TonB-dependent iron transporters                              |
| <b>Rhodobacter capsulatus</b>  |                                 |          |             |                     |                                                                              |
| RRC03231                       | <i>hemN2</i>                    | -143     | 4.78        | ctTGACaAAATTAcTCgGA | paralog of oxygen-independent coproporphyrinogen III oxidase                 |
| RRC03288                       | <i>X-feoAB</i>                  | -66      | 4.22        | cCatACTAtTTcAGTCAGg | ferrous iron transporter                                                     |
|                                |                                 | -35      | 4.5         | ctTGACTtATccAGTCAGA |                                                                              |
| RRC04402                       | <i>viuA</i>                     | -242     | 4.42        | gCcGAtaAAAaTAcTCgGA | vibriobactin receptor precursor                                              |
| RRC04403                       | <i>fepBDGC</i>                  | -74      | 4.42        | TCcGAgTAtTTTTaTCgGc | ferrienterobactin ABC transporter                                            |
| RRC04414                       | <i>araX2</i>                    | -421     | 4.41        | TgTGACaAAAaTAGTCAac | AraC-type regulator for siderophore uptake (next to fhuA3<>fepBDGC2-mxcB)    |
| RRC04415                       | <i>araX3</i>                    | -50      | 4.41        | gtTGACTAtTTTTGTCaCA | AraC-type regulator for siderophore uptake                                   |
| RRC02269                       | <i>araX4 - fhuA1-fhuDBC</i>     | -56      | 4.38        | gtTGAtTgtTTctGTCAGA | ferrichrome iron receptor, ABC transporter                                   |
| RRC00211                       | <i>FTR1-COG2837-chpA</i>        | -32      | 4.28        | TCcGACaAAATaAaTaAGg | High-affinity Fe <sup>2+</sup> transport component and permease, peroxidase  |
| RRC04484                       | <i>araX1 -irp6ABC</i>           | -100     | 4.26        | CtTGtgTaATTTtGTCAGG | ferrisiderophore ABC transporter                                             |
| RRC04485                       | <i>fhuA2-fes</i>                | -40      | 4.26        | cCTGACaAAATTAcCAag  | ferrichrome iron receptor, enterochelin esterase                             |
| RRC01804                       | <i>X- hmuP</i>                  | -85      | 4.26        | cCcGACTAAAagAtTCgGg | hemin uptake protein                                                         |
| RRC01044                       | <i>fbpAB</i>                    | -83      | 4.2         | ctTGACggATTTAGTCAtg | ferric cations ABC transporter                                               |
| RRC02196                       | <i>troA-fecD</i>                | -34      | 4.18        | atcGACTctTTcAcTCgGA | iron siderophore ABC transporter                                             |
| RRC04521                       | <i>hmuRSTUV</i>                 | -98      | 4.17        | ctTGACaAAATgAcTagGA | hemin receptor, ABC transporter                                              |
| RRC04412                       | <i>fepBCDE2</i>                 | -121     | 4.11        | aCTGAtggtTTTTGTCAGA | ferrienterobactin ABC transporter                                            |
| RRC04413                       | <i>fhuA3</i>                    | -173     | 4.11        | TCTGACaAAAaccaTCAGt | ferrichrome iron receptor                                                    |
| RRC01434                       | <i>exbB-exbD-tonB</i>           | -92      | 4.11        | ctTGACaAgTTcAcTCAac | components for TonB-dependent iron transporters                              |
| RRC00380                       | <i>fssA</i>                     | -55      | <u>3.93</u> | ctTGACggtTTcgGTCgGc | hypothetical Fe-S scaffold protein                                           |
| <b>Silicibacter sp. TM1040</b> |                                 |          |             |                     |                                                                              |
| TM1040_0124                    | <i>fbpA</i>                     | -125     | 4.77        | TCTGACTgAATTtATCgGA | ferric cations ABC transporter                                               |
| TM1040_2198                    | <i>hmuP-irpA</i>                | -259     | 4.56        | TCTGACcAAATaAaTCAGg | hemin uptake protein, iron-regulated protein A                               |
| TM1040_2633                    |                                 | -117     | 4.38        | TCcGACaAAAaTAcTagGg | hypothetical protein A, conserved regulation in MED193 and ISM               |
| TM1040_3525                    | <i>sdhCDAB</i>                  | -174     | <u>4.08</u> | TCTGACTgtTaTAcTtgGg | succinate dehydrogenase                                                      |
| TM1040_2200                    | <i>bfd-bfr</i>                  | -72      | <u>4.08</u> | gCTtAtTctTTTAcTCgGA | bacterioferritin ferredoxin, bacterioferritin                                |
| TM1040_0347                    | <i>hmuR-Smc01514-exbBD-tonB</i> | -190     | <u>3.91</u> | ctTGACagATTTAaTaAat | hemin receptor, conserved protein, components of TonB-dependent transporters |
| TM1040_0346                    | <i>hmuSTUV</i>                  | -127     | <u>3.91</u> | atTtAtTAAATctGTCAag | hemin ABC transporter                                                        |
| TM1040_1240                    | <i>iscR -sufSBCD</i>            | -138     | <u>3.7</u>  | ctTGACgAATTTtATCcGg | Fe-S cluster assembly                                                        |
| <b>Silicibacter pomeroyi</b>   |                                 |          |             |                     |                                                                              |
| SPO0086                        | <i>irpA</i>                     | -89      | 4.94        | aCTGACaAATTTAGTCAGA | iron-regulated protein A                                                     |

|                                            |                                 |      |      |                      |                                                                                |
|--------------------------------------------|---------------------------------|------|------|----------------------|--------------------------------------------------------------------------------|
| SPO3139                                    |                                 | -32  | 4.68 | TCcGACTttAacAGTCgGA  | similar to truncated hemoglobins                                               |
| SPO3287                                    | <i>fbpA</i>                     | -51  | 4.56 | cCcGACTgAAAaTAaTCAGt | ferric cations ABC transporter                                                 |
|                                            |                                 | -2   | 4.67 | atTGACTAtTTcAGTCgGA  |                                                                                |
| SPO0789                                    | <i>hmuP-hmuX*</i>               | -100 | 4.44 | ggcGACaAAAaTAGTCAGg  | hemin uptake protein, hypothetical conserved protein                           |
| SPO2025                                    | <i>iscR-sufSBCD</i>             | -140 | 4.04 | ctTGACgAATTcccTCgGg  | Fe-S cluster assembly                                                          |
| SPO3288                                    | <i>fbpB</i>                     | -26  | 4.06 | TCcGACTAAAaTgGTCgat  | ferric cations ABC transporter                                                 |
| <b>Jannaschia sp. CC51</b>                 |                                 |      |      |                      |                                                                                |
| Jann_0118                                  | <i>fbpA</i>                     | -38  | 5.05 | cCTGACTgtTTTAGTCgGA  | ferric cations ABC transporter                                                 |
| Jann_3275                                  | <i>hmuP-Jann3275</i>            | -82  | 4.95 | tCTGAgTAAAaTAcTCAGG  | COG4256: hemin uptake protein, hypothetical Fe-S protein                       |
|                                            |                                 | -54  | 4.24 | gCatACTAtTTTAGTCAGG  |                                                                                |
| Jann_2122                                  | <i>fecB</i>                     | -60  | 4.15 | TCTaACTAtTTctGTCAGc  | iron(III) dicitrate-binding protein                                            |
|                                            |                                 | -35  | 4.86 | TCTGACTAAAaTAcTCAac  |                                                                                |
| Jann_2123                                  | <i>fecCDE</i>                   | -60  | 4.86 | gtTGAgTAatTTTAGTCAGA | iron(III) dicitrate ABC transporter, permease subunits, ATPase                 |
|                                            |                                 | -35  | 4.15 | gCTGACagAAAaTAGTtAGA |                                                                                |
| Jann_3277                                  | <i>Jann_3277-dps</i>            | -30  | 4.66 | cCTGAgTAATAcAcTCAag  | hypothetical protein, DNA-binding ferritin-like protein Dps                    |
| Jann_1368                                  | <i>irpA</i>                     | -254 | 4.58 | TCTGACaAAAcaAGTCAGg  | iron-regulated protein A (Vibrio)                                              |
| Jann_2132                                  | <i>hmuR-Smc01514-exbBD-tonB</i> | -143 | 4.28 | gtTGACgctTTTAGTCgGA  | hemin receptor, conserved protein, components of TonB-dependent transporters   |
| Jann_2133                                  | <i>hmuSTUV</i>                  | -132 | 4.28 | TCcGACTAAAagcGTCAac  | hemin ABC transporter                                                          |
| <b>Rhodobacteriales bacterium HTCC2654</b> |                                 |      |      |                      |                                                                                |
| RB2654_08847                               | <i>X-hmuP-hmuX*</i>             | -90  | 5    | TCcGACTgAATTtGTCAGA  | COG4256: hemin uptake protein, hypothetical conserved protein                  |
| RB2654_04329                               | <i>fbpA</i>                     | -53  | 4.96 | cCTGACgAATTTAGTCAGA  | ferric cations ABC transporter                                                 |
| RB2654_09494                               | <i>fecB-mxcB</i>                | -66  | 4.74 | cCcGACTgATTTAGTCAat  | iron(III) dicitrate-binding protein, siderophore-interacting protein           |
|                                            |                                 | -33  | 4.55 | TCcGACTgAAacAcTCAac  |                                                                                |
| RB2654_09499                               | <i>fecCDE</i>                   | -88  | 4.55 | gtTGAgTgtTTcAGTCgGA  | iron(III) dicitrate ABC transporter, permease subunits, ATPase                 |
|                                            |                                 | -55  | 4.74 | atTGACTAAATcAGTCgGg  |                                                                                |
| RB2654_15781                               | <i>hmuR</i>                     | -111 | 4.48 | gtTGACTAAATTAcTaAGc  | hemin receptor                                                                 |
| RB2654_15786                               | <i>hmuSTUV-exbBD-X-tonB</i>     | -119 | 4.48 | gCTtAgTAATTTAGTCAac  | hemin ABC transporter                                                          |
| RB2654_13154                               | <i>irpA</i>                     | 9    | 4.48 | TCcGACcAAATcAaTCAGc  | iron-regulated protein A                                                       |
| <b>Roseobacter sp. MED193</b>              |                                 |      |      |                      |                                                                                |
| MED193_19679                               | <i>hmuP-hmuX*-irpA</i>          | -117 | 5.1  | TCTGACaAAAaTAGTCAGA  | hemin uptake protein, hypothetical conserved protein, iron-regulated protein A |
|                                            |                                 | -90  | 4.5  | ctTGAtTgtTTTAAaTCAGg |                                                                                |
| MED193_15812                               |                                 | -140 | 5.1  | TCTGACTAtTTTTGTCAGA  | hypothetical protein A                                                         |
| MED193_19654                               | <i>bfd-bfr</i>                  | -102 | 4.25 | cCTGACaAAAacAaTaAGc  | bacterioferritin ferredoxin, bacterioferritin                                  |
|                                            |                                 | -71  | 4.37 | cCTtAtTgtTTTTGTCAGA  |                                                                                |
| MED193_04321                               | <i>iscR-sufSBCD</i>             | -143 | 3.96 | ctTGACgAATTccaTCAGc  | Fe-S cluster assembly                                                          |
| MED193_17499                               | <i>hmuSTUV</i>                  | -120 | 3.95 | ggTGAtaAAAacAGTCAac  | hemin ABC transporter                                                          |
| MED193_17504                               | <i>hmuR-Smc01514-exbBD-tonB</i> | 68   | 3.95 | gtTGACTgtTTTTaTCAcc  | hemin receptor, conserved protein, components of TonB-dependent transporters   |
| MED193_22076                               | <i>fecBCDE-mxcB</i>             | -354 | 3.96 | ctTGACaAAAacctGTaAGg | iron(III) dicitrate ABC transporter                                            |
| <b>Roseovarius sp. 217</b>                 |                                 |      |      |                      |                                                                                |
| ROS217_23057                               | <i>fbpA</i>                     | -97  | 4.9  | TCcGACTAAAactGTCAGA  | ferric cations ABC transporter                                                 |
|                                            |                                 | -71  | 4.62 | atTGACTctTTTAGTCAGA  |                                                                                |
| ROS217_22882                               | <i>fhuABCD</i>                  | -31  | 4.55 | cCTGAgTtAAagAGTCgGA  | ferrichrome iron receptor, ABC transporter                                     |

|                                       |                                 |      |      |                      |                                                                                    |
|---------------------------------------|---------------------------------|------|------|----------------------|------------------------------------------------------------------------------------|
| ROS217_10107                          | <i>irpA</i>                     | -146 | 4.43 | gCctACTAAATcAGTCAac  | iron-regulated protein A (Vibrio)                                                  |
| ROS217_17432                          | <i>hmuSTUV</i>                  | -112 | 4.23 | TaTGAgTAAAagAGTCAag  | hemin ABC transporter                                                              |
| ROS217_17442                          | <i>hmuR</i>                     | -199 | 4.23 | ctTGACTctTTTAcTCAtA  | hemin receptor                                                                     |
| ROS217_23865                          | <i>hmuP-hmuX*-bfd-bfr</i>       | -151 | 4.13 | TCTGAtcAAAagAaTCgGA  | hemin uptake protein, hypothetical conserved protein, ferredoxin, bacterioferritin |
|                                       |                                 | -123 | 4.55 | cCTtAtTAATTaAGTCAGA  |                                                                                    |
| ROS217_20592                          | <i>fbpC</i>                     | -35  | 4.07 | cCcGAtagATTTgaTCgGA  | ferric cations ABC transporter, ATPase component                                   |
| ROS217_22872                          | <i>mxcB-Smc01514-exbBD-tonB</i> | -56  | 4.07 | gtTGACaAATTacaTCAGg  | siderophore-interacting protein, components of TonB-dependent transporters         |
| ROS217_22877                          | <i>araX</i>                     | -166 | 4.07 | cCTGAtgtAATTtGTCAac  | siderophore uptake AraC-type regulator                                             |
| <b>Roseovarius nubinhibens ISM</b>    |                                 |      |      |                      |                                                                                    |
| ISM_05125                             | <i>fbpA</i>                     | -139 | 5.11 | CtTGACTAAATTAGTCgGa  | ferric cations ABC transporter                                                     |
|                                       |                                 | -105 | 4.95 | tCcGAgTAtTTTAGTCgGa  |                                                                                    |
| ISM_01000                             | <i>hmuP-bfd-bfr</i>             | -204 | 4.98 | tCTGACTAAAaaAGTCgGa  | COG4256: hemin uptake protein, bacterioferritin ferredoxin, bacterioferritin       |
|                                       |                                 | -177 | 4.65 | tCTGACagAATaAaTCAGA  |                                                                                    |
| ISM_15940                             | ISM_15940-15945                 | -82  | 4.76 | tCcGACTctTTTTgTCAGA  | hypothetical protein, hypothetical protein A                                       |
| ISM_04365                             | <i>irpA</i>                     | -81  | 4.72 | CCcGAgTAtTTcAcTCAGG  | iron-regulated protein A (Vibrio)                                                  |
| ISM_00940                             | <i>OMP1</i>                     | -116 | 4.67 | CCTGAgTAAAagAcTCAGG  | TonB-dependent siderophore receptor                                                |
| ISM_04230                             | <i>hmuSTUV</i>                  | -109 | 4.28 | tCaGACTAAAactGTCAaG  | hemin ABC transporter                                                              |
| ISM_04235                             | <i>hmuR</i>                     | -158 | 4.28 | CtTGACagtTTTAGTCtGa  | hemin receptor                                                                     |
| ISM_05670                             | <i>OMP2</i>                     | -99  | 4.07 | CtTGACTttTTgccTCAGG  | TonB-dependent siderophore receptor                                                |
| <b>Loktanella vestfoldensis SKA53</b> |                                 |      |      |                      |                                                                                    |
| SKA53_06277                           | 6277- <i>dps</i>                | -32  | 4.86 | gCTGACTAtATTtGTCGGg  | COG0783, DNA-binding ferritin-like protein Dps                                     |
| SKA53_14131                           | <i>hmuP-hmuX*</i>               | -42  | 4.86 | cCTGACTAAAaaAcTCAGg  | COG4256: hemin uptake protein, hypothetical conserved protein                      |
| SKA53_06267                           | Jann3275                        | -48  | 4.64 | gCTGACagAAaTAaTCAGA  | hypothetical Fe-S protein                                                          |
| SKA53_05313                           | <i>fbpA</i>                     | -79  | 4.6  | cCCGACTAAAaTAtTCAGg  | ferric cations ABC transporter                                                     |
| SKA53_02241                           | <i>fbpB</i>                     | -73  | 4.5  | TCCGAtcAAATaAGTCAGA  | ferric cations ABC transporter                                                     |
| SKA53_06417                           | <i>hmuR-Smc01514-exbBD-tonB</i> | -112 | 4.47 | ctTGACTgtTTgtGTCGGA  | hemin receptor, conserved protein, components of TonB-dependent transporters       |
| SKA53_06422                           | <i>hmuSTUV</i>                  | -121 | 4.47 | TCCGACacAAacAGTCAag  | hemin ABC transporter                                                              |
| SKA53_05183                           | <i>iscR-sufSBCD</i>             | -130 | 4.16 | ctTGACgAAAactaTCAGg  | Fe-S cluster assembly                                                              |
| <b>Sulfitobacter sp. EE-36</b>        |                                 |      |      |                      |                                                                                    |
| EE36_08018                            | <i>araX</i>                     | -114 | 4.96 | TCCGAgTAAATTTgTCAGA  | siderophore uptake AraC-type regulator                                             |
| EE36_05618                            | <i>fbpB</i>                     | -27  | 4.94 | TCCGACTgAATTAGTCGaA  | ferric cations ABC transporter, permease component                                 |
| EE36_10464                            | <i>hmuP-hmuX*</i>               | -273 | 4.81 | TCCGACTAAAactGTGCGGA | COG4256: hemin uptake protein, hypothetical conserved protein                      |
|                                       |                                 | -246 | 4.02 | cCCtAtaAtTTcAaTCAGg  |                                                                                    |
| EE36_01780                            | <i>fhuA2-X-mxcB</i>             | -29  | 4.69 | TCCGACTAAAacAGTaAGg  | TonB-dependent siderophore receptor, siderophore-interacting protein               |
| EE36_02713                            | <i>irpA</i>                     | -139 | 4.62 | TCTtACTAAAaTtGTCGGg  | iron-regulated protein A                                                           |
| EE36_08023                            | <i>fhuABCD</i>                  | -45  | 4.42 | aCTGAgTtAAaTAcTCGGA  | ferrichrome iron receptor, ABC transporter                                         |
| EE36_12993                            | <i>Smc01514-exbBD-tonB</i>      | -168 | 4.33 | gtTGAtTgtTaaAGTCAGg  | conserved protein, components of TonB-dependent transporters                       |
| EE36_05613                            | <i>fbpA</i>                     | -167 | 4.27 | TtTGACacAAagAcTCAGg  | ferric cations ABC transporter, periplasmic component                              |
|                                       |                                 | -92  | 4.26 | TCCtAtTAATTcAcTCAag  |                                                                                    |
| EE36_01530                            | <i>hmuR</i>                     | -113 | 4.23 | aCCGACTAAAagtGTCAac  | hemin receptor                                                                     |
| EE36_01535                            | <i>hmuSTUV</i>                  | -257 | 4.23 | gtTGACactTTTAGTCGGt  | hemin ABC transporter                                                              |
| EE36_10454                            | <i>OMP1</i>                     | -81  | 4.23 | ctTGAtTgtTTTTaTCAGc  | TonB-dependent siderophore receptor                                                |

|                                      |                                 |      |             |                     |                                                                          |
|--------------------------------------|---------------------------------|------|-------------|---------------------|--------------------------------------------------------------------------|
| EE36_16412                           | <i>fbpC</i>                     | -31  | <u>3.98</u> | cCCGAgcgAATTgaTCGGA | ferric cations ABC transporter, ATPase component                         |
| <b>Oceanicola batsensis HTCC2597</b> |                                 |      |             |                     |                                                                          |
| OB2597_05425                         | <i>hmuP-Smc01514-exbBD-tonB</i> | -193 | 4.53        | ctTGACTAATTTgaTCGGA | COG4256: hemin uptake protein, components of TonB-dependent transporters |
| OB2597_08064                         | <i>OMP2</i>                     | -167 | 4.54        | TCCGACTgATaTAGTCAcc | TonB-dependent siderophore receptor                                      |
| OB2597_04193                         | <i>fbpA</i>                     | -61  | 4.66        | cCTGACcAAAaTAcTCGGA | ferric cations ABC transporter, periplasmic component                    |
| OB2597_00230                         | <i>nuoABCDEFGHIJLMN</i>         | -204 | 4.41        | cCCtACTgAAagAGTCAGg | NADH ubiquinone oxidoreductase                                           |
| OB2597_09404                         | <i>fecBCDE-mxcB</i>             | -153 | 4.14        | atCGACTgtTTTTGTCGGt | iron(III) dicitrate ABC transporter, siderophore-interacting protein     |
|                                      |                                 | -50  | 4.24        | TCCGACTgAAacAaTCAtg |                                                                          |
| OB2597_09409                         | <i>fhuA</i>                     | -391 | 4.24        | caTGAtTgtTTcAGTCGGA | ferrichrome iron receptor                                                |
|                                      |                                 | -288 | 4.14        | aCCGACaAAAacAGTCGat |                                                                          |
| OB2597_06825                         | <i>hmuX*</i>                    | -96  | 4.21        | ggTGAgcAAAaTAGTCAGg | hypothetical conserved protein                                           |
| OB2597_05460                         | <i>OMP1</i>                     | -100 | 4.1         | TCTGACggtTTTTaTCAac | TonB-dependent siderophore receptor                                      |
| OB2597_03589                         | <i>iscR-sufSBCD</i>             | -133 | <u>3.92</u> | CtTGACgacTTtgGTCAaG | Fe-S cluster assembly                                                    |
| OB2597_00425                         | <i>fbpC</i>                     | -27  | <u>4.02</u> | cCTtAgTAAATccaTCgGA | ferric cations ABC transporter, ATPase component                         |

**Color code for functional roles of genes:**

**Genes involved in iron uptake**

**Genes involved in iron storage**

**Genes involved in iron utilization pathways (synthesis of Fe-S, heme; iron-containing enzymes)**

**Transcription factors (*rirA*, *araX*, *fecIR*, *irr*)**

**Genes with other or uncertain functional roles**
