# Supplementary material
Source: PubMed Central journal article supplement (PMC1764042)
Supplement: pcbi.0020163.st003.pdf [file pcbi.0020163.st003.pdf]

Suppl. Table S3. The Irr regulon in alpha-proteobacteria

| Locus ID                                                                | Operon                    | Position | Score | Irr site (ICE)          | Function                                                                |
|-------------------------------------------------------------------------|---------------------------|----------|-------|-------------------------|-------------------------------------------------------------------------|
| <b><i>Sinerhizobium meliloti</i></b>                                    |                           |          |       |                         |                                                                         |
| SMc00529                                                                | <i>sufS2-sufBCDS1XA</i>   | -132     | 6.02  | AcTTTAGAAccgTTCaAAACT   | Fe-S cluster assembly                                                   |
| SMc01119                                                                | <i>fssA</i>               | -61      | 5.87  | AtTTTgGAAcAATTCTAAAaa   | hypothetical Fe-S scaffold protein                                      |
| SMc03104                                                                | <i>hemA</i>               | -245     | 5.87  | AtTTTgGAATggTTCaAAACT   | heme biosynthesis                                                       |
| SMc00784                                                                | <i>fbpA</i>               | -147     | 5.76  | AGTTTgGAAcAATTCcAAAaa   | ABC-type Fe <sup>3+</sup> transport system, periplasmic component       |
| SMc00785                                                                | <i>rirA</i>               | -73      | 5.76  | ttTTTgGAATTgTTCcAAACT   | Iron-responsive regulator RirA                                          |
| SMc00359                                                                | <i>mbfA</i>               | -32      | 5.67  | taaTTAGAATTATTCTAAAgA   | membrane-bound ferritin                                                 |
| SMc04019                                                                | <i>hemH</i>               | -75      | 5.29  | ttTTTAGAAggATTtgAAACT   | ferrochelatase (haem biosynthesis)                                      |
| SMc00455                                                                |                           | -99      | 5.28  | cGTTTcGAACTGTTcGAAAtCc  | putative hemolysin III                                                  |
| SMc03787                                                                | <i>bfd-bfr</i>            | -118     | 5.26  | AGTTTAGAATcgcTCTAAAtgc  | bacterioferritin ferredoxin, bacterioferritin                           |
| SMb21432                                                                | <i>irp6A1-irp6BC</i>      | -85      | 5.26  | tGTTTgGAAgcgTTCTAAAag   | ferrisiderophore ABC transporter                                        |
| SMc00402                                                                | <i>irpA</i>               | -117     | 4.86  | AacTTcaAgccgTTCTAAACT   | iron-regulated protein A ( <i>Vibrio</i> )                              |
| <b><i>Mesorhizobium loti</i></b>                                        |                           |          |       |                         |                                                                         |
| mlr5523                                                                 | <i>irpA-bfd-bfr</i>       | -245     | 6.70  | AGTTTAGAATAAATTCTAAACT  | iron-regulated protein A, bacterioferritin ferredoxin, bacterioferritin |
| mlr4601                                                                 | <i>mbfA</i>               | -36      | 6.63  | AGTTTAGAAcAATTCTAAACT   | membrane-bound ferritin                                                 |
| mlr0015                                                                 | <i>sufS2-sufBCDS1XA</i>   | -151     | 6.38  | AGTTTAGAAcTATTcAAAACCT  | Fe-S cluster assembly                                                   |
| mll5315                                                                 | <i>fssA</i>               | -49      | 6.04  | taTTTAGAAcTATTcAAAACCT  | hypothetical Fe-S scaffold protein                                      |
| mlr4647                                                                 |                           | -33      | 5.20  | AGcTTAGAAATcTTCaAAACT   | cytochrome b561, homologs in beta and gamma                             |
| mll2542                                                                 |                           | -89      | 5.16  | ttTTTAtAATgATTcAAAAGT   | probable drug transporter                                               |
| mlr1147                                                                 | <i>rirA</i>               | -140     | 5.10  | AGTcTgGAATTgTTCcAAAggT  | Iron-responsive regulator RirA                                          |
| mll4333                                                                 | <i>ccmABCDG</i>           | -85      | 5.02  | ttTcTgGAATAgTTCTAgACa   | heme export                                                             |
| mlr6940                                                                 | <i>katG</i>               | -23      | 5.02  | AGTcTgGAATcgtTCcAgAtT   | catalase (peroxidase I)                                                 |
| <b><i>Mesorhizobium sp. BNC1</i></b>                                    |                           |          |       |                         |                                                                         |
| MBNC03003400                                                            | <i>fbpAB</i>              | -142     | 6.70  | AGTTTAGAATAAATTCTAAACT  | ferric cations ABC transporter                                          |
| MBNC03003799                                                            | <i>sufS2-sufBCDS1XA</i>   | -136     | 6.31  | AGTTTAGAAcTgTTCaAAACT   | Fe-S cluster assembly                                                   |
| MBNC03003055                                                            | <i>mbfA</i>               | -38      | 6.20  | AGTTTAGAATTATTCTAAAtCa  | membrane-bound ferritin                                                 |
| MBNC03003089                                                            | <i>fssA</i>               | -43      | 5.87  | AtTTTAGAATTgTTCcAAAaa   | hypothetical Fe-S scaffold protein                                      |
| MBNC03002826                                                            | <i>katG</i>               | -37      | 4.95  | AGTcTgGAATAgTTCTAgggT   | catalase (peroxidase I)                                                 |
| <b><i>Rhizobium leguminosarum</i></b>                                   |                           |          |       |                         |                                                                         |
| RL2583                                                                  | <i>sufS2-sufBCDS1XA</i>   | -132     | 6.36  | AGTTTAGAAcAATTCgAAACT   | Fe-S cluster assembly                                                   |
| RL0263                                                                  | <i>mbfA</i>               | -35      | 6.06  | gaTTTAGAATTATTCTAAAaT   | membrane-bound ferritin                                                 |
| RL0777                                                                  | <i>rirA</i>               | -68      | 5.95  | AtTTTgGAATTgTTCaAAACT   | Iron-responsive regulator RirA                                          |
| RL0400                                                                  | <i>fssA</i>               | -43      | 5.30  | tcTTTtGAAgcATTCTAAAgA   | hypothetical Fe-S scaffold protein                                      |
| RL1432                                                                  | <i>feuPQ-lipA-cycHJKL</i> | -108     | 5.30  | AGTcgAGAAcAgTTCTAAACa   | regulator, maturation of cytochrome c?                                  |
| RL4379                                                                  | <i>hemA1</i>              | -113     | 5.36  | taTcTgGAATcATTcAAAACCT  | heme biosynthesis                                                       |
| RL0322                                                                  | <i>irpA</i>               | -205     | 5.24  | ttcTTAaAATcATTcAAAACCT  | iron-regulated protein A                                                |
| RL2703                                                                  | <i>fumA</i>               | -55      | 4.91  | gaTTTAGAaccggTTCcAAAtCT | fumarate hydratase class I                                              |
| RL2713                                                                  | <i>irp6ABC</i>            | -93      | 4.79  | AGTTTgGAAacgcTCTAAAac   | ferrisiderophore ABC transporter                                        |
| <b>Experimental data: Irr/iron-regulated genes (Todd et al., 2006b)</b> |                           |          |       |                         |                                                                         |

**Rhizobium etli**

|             |                         |      |      |                        |                                    |
|-------------|-------------------------|------|------|------------------------|------------------------------------|
| RHE_CH00257 | <i>mbfA</i>             | -35  | 6.22 | gGTTTAGAATTATTCTAAAAtT | membrane-bound ferritin            |
| RHE_CH00304 | <i>irpA</i>             | -98  | 5.49 | AtcTTAAaAATTATTCcAAACT | iron-regulated protein A           |
| RHE_CH00381 | <i>fssA</i>             | -56  | 5.38 | tCtTTTtGAAgAATTCTAAAga | hypothetical Fe-S scaffold protein |
| RHE_CH00735 | <i>rirA</i>             | -70  | 5.95 | AtTTTgGAATTgTTCaAAACT  | Iron-responsive regulator RirA     |
| RHE_CH02254 | <i>sufS2-sufBCDS1XA</i> | -205 | 6.36 | AGTTTAGAAcAATTCgAAACT  | Fe-S cluster assembly              |
| RHE_CH03846 | <i>hemA1</i>            | -117 | 5.18 | tGtCtGGAATcATTcAAAaa   | heme biosynthesis                  |
| RHE_CH02385 | <i>fumA</i>             | -157 | 4.55 | caTTTAGATcggTTCcAAAttT | fumarate hydratase class I         |

**Agrobacterium tumefaciens**

|            |                         |      |      |                        |                                                       |
|------------|-------------------------|------|------|------------------------|-------------------------------------------------------|
| AGR_C_3350 | <i>sufS2-sufBCDS1XA</i> | 32   | 6.43 | AGTTTAGAATAATTCgAAACT  | Fe-S cluster assembly                                 |
| AGR_C_430  | <i>mbfA</i>             | -80  | 5.24 | ttgTTAGAATTATTCTAAAac  | membrane-bound ferritin                               |
|            |                         | -33  | 6.05 | taTTTAGAATTATTCTAAAaa  |                                                       |
| AGR_C_344  | <i>rirA</i>             | -65  | 5.61 | ttTcTgGAATTgTTCTAAACT  | Iron-responsive regulator RirA                        |
| AGR_C_346  | <i>fbpA</i>             | -84  | 5.61 | AGTTTAGAAcAATTCcAgAaa  | ABC-type Fe3+ transport system, periplasmic component |
| AGR_L_1858 | <i>irgA</i>             | -78  | 5.65 | AaTTTAGAAcTgTTCgAAAac  | iron-regulated outer membrane receptor irgA           |
| AGR_C_616  | <i>fssA</i>             | -57  | 5.64 | ttTTTgGAAgAATTCTAAAAtT | hypothetical Fe-S scaffold protein                    |
| AGR_C_493  | <i>irpA</i>             | -40  | 5.45 | tGTTTcaAAgCATTCTAAACT  | iron-regulated protein A                              |
| AGR_L_1661 | <i>fhuADBC</i>          | -167 | 5.49 | AGaTTtGAATAATTCcAAgCT  | hydroxamate-dependent iron uptake                     |
| AGR_C_2495 | <i>fdx</i>              | -70  | 5.27 | tGTTTAGAAcAATTCtCagaT  | ferredoxin, 2fe-2S                                    |
| AGR_C_5028 | <i>bfd-bfr</i>          | -119 | 5.26 | AGTTTAGAAcAgTCTAgAga   | bacterioferritin ferredoxin, bacterioferritin         |
| AGR_C_4738 | <i>hemA</i>             | -62  | 5.20 | ttAtTgGAATggTTCaAAAca  | heme biosynthesis                                     |
| AGR_C_4488 | <i>fatBDCE</i>          | -44  | 5.17 | AaTTcAGAAccgTTCTAAAac  | ferric anguibactin ABC transporter                    |
| AGR_L_2862 | <i>irp6AABC</i>         | -90  | 4.97 | AGTTaAGAATggcTCTAAAac  | ferrisiderophore ABC transporter                      |

**Brucella melitensis**

|          |                           |      |      |                         |                                                                     |
|----------|---------------------------|------|------|-------------------------|---------------------------------------------------------------------|
| BMEI0354 | <i>mbfA</i>               | -204 | 6.39 | AtTTTAGAATTATTCTAAAAtT  | membrane-bound ferritin                                             |
| BMEI0885 | <i>tpd-X-ftr1-COG0348</i> | -136 | 5.81 | tGTTTAGAATTgaTCTAAACT   | High-affinity Fe2+ transport component and permease, polyferredoxin |
| BMEI0707 | <i>rirA</i>               | -161 | 5.41 | ttTTaAGAATgATTCTAAAgt   | Iron-responsive regulator RirA                                      |
| BMEI1892 |                           | -306 | 5.70 | AGTcTAGAATAtTTCTAAACT   | hypothetical cytosolic protein (cysteine-rich)                      |
| BMEI1724 |                           | -102 | 5.18 | tCtTTTaaAgccATTCTAAAAtT | hypothetical protein                                                |
| BMEI0705 | <i>bfd-bfr</i>            | -300 | 5.05 | ttTTTAGAATAtTTCaAAAac   | bacterioferritin ferredoxin, bacterioferritin                       |
| BMEI1042 | <i>sufBCDS1X</i>          | -118 | 4.75 | AGTTTAGAgaggTTtTAAAga   | Fe-S cluster assembly                                               |

**Bartonella quintana**

|         |                   |      |      |                       |                              |
|---------|-------------------|------|------|-----------------------|------------------------------|
| BQ11660 | <i>mbfA</i>       | -37  | 5.97 | AtcTTAGAATTATTCTAAAgt | ferritin-like and TM domains |
| BQ01080 | <i>ccmABCDG</i>   | -97  | 5.14 | ttTcTAGAAcTATTCTAgAta | heme export                  |
| BQ05950 | <i>sufBCDS1XA</i> | -149 | 5.14 | gaaTTAGAATTATTtTAAAaa | Fe-S cluster assembly        |

**Bradyrhizobium japonicum**

|         |                      |      |      |                        |                                                  |
|---------|----------------------|------|------|------------------------|--------------------------------------------------|
| blr7895 | <i>mbfA</i>          | -39  | 5.95 | AaTTTAGAATCATTCTAAACT  | membrane-bound ferritin                          |
| bsl6680 | <i>bfr</i>           | -61  | 5.50 | caTTTAGAAgCgTTCTAAAAtT | bacterioferritin                                 |
| bsl6681 | <i>bfd</i>           | -127 | 5.19 | AtTTTAGAgcCgTTCTAggCT  | bacterioferritin ferredoxin                      |
| blI7968 | <i>fhuA3-piuB</i>    | -115 | 5.12 | cGcTTAGAAcCATTcAaACT   | outer membrane iron receptor, Iron-uptake factor |
| blr4339 | <i>sufBCDS1XA</i>    | -103 | 5.07 | cGgcTtGAAcGgTTCTAAgCg  | Fe-S cluster assembly                            |
| blr4504 | <i>fhuA1-blr4505</i> | -170 | 4.90 | cGTcTAGAAgGATTCcAAAAtc | outer membrane iron receptor                     |

|                |                                |      |      |                       |                                                                               |
|----------------|--------------------------------|------|------|-----------------------|-------------------------------------------------------------------------------|
| <i>blr3904</i> | <i>fiu-piuC-exbBD-tonB2</i>    | -185 | 4.83 | gtTTTAGAAcGAcTCcAAttT | outer membrane iron receptor, iron uptake factor, iron transporter components |
|                |                                | -163 | 4.81 | AcTTTAGAAcCgTTtgAAACT |                                                                               |
|                |                                | -140 | 4.98 | AGaTTAGAATCgTTtTgAtCT |                                                                               |
| <i>bll5796</i> | <i>fumA</i>                    | -61  | 4.83 | AGcTTAGAAcGcTTCTAtgCc | fumarate hydratase, class I                                                   |
| <i>blr0512</i> | <i>sdhCDAB</i>                 | -267 | 4.79 | gGcTTAGAgcCgTTcCAAtag | succinate dehydrogenase                                                       |
| <i>bsr6522</i> | <i>feoAB</i>                   | -80  | 4.64 | AcTTTAaAATCAcTCTAAggT | ferrous iron transporter                                                      |
| <i>blr0778</i> | <i>katG</i>                    | 113  | 4.64 | gGcTTAGAgTGgTTCTAcctg | catalase (peroxidase I)                                                       |
| <i>bll0768</i> | <i>irr</i>                     | -95  | 4.63 | cGaTTAGAAcCtcTCTAgttg | iron response regulator                                                       |
| <i>bll7076</i> | <i>hmuR-XX-exbBD-tonB1</i>     | -166 | 4.62 | AaTTTAcAATCgaTaTAAACT | hemin receptor                                                                |
| <i>blr7077</i> | <i>hmuTUV</i>                  | -303 | 4.62 | AGTTTAtAtcGATTgTAAAtT | hemin ABC transporter                                                         |
| <i>bll3138</i> | <i>nuoEF-fdhFD-bll3134</i>     | -57  | 4.57 | AtcTTcGAATGATTcAAAAta | NAD-dependent formate dehydrogenase                                           |
| <i>bll2737</i> | <i>bll2737-bll2736</i>         | -51  | 4.56 | tGaTTtGAAcagTTcCAAttT | Fe-S oxidoreductase, putative aldehyde dehydrogenase                          |
| <i>blr674</i>  | <i>blr6742-blr6743-blr6744</i> | -126 | 4.51 | AcTTcgGAAgAgTTCTAAtaa | pyridine nucleotide-disulphide oxidoreductase, ferredoxin oxidoreductase      |
| <i>blr2933</i> |                                | -45  | 4.44 | tGaTTgGAATGATTtcAgACT | probable aerotaxis receptor                                                   |
| <i>bll4919</i> | <i>nuoABCDEFGHIJLMN</i>        | -68  | 4.43 | gGcTcAGAATaATTcAAAAtc | NADH ubiquinone oxidoreductase                                                |
| <i>bll4920</i> | <i>fhuA2</i>                   | -120 | 4.43 | AtgTTgGAtcGcTTCTAAgag | outer membrane iron receptor                                                  |
| <i>blr1720</i> | <i>hupSLCDFGHIJK-hypABFCD</i>  | -82  | 4.43 | AcTTTtGAATCgcTcCAggCT | membrane-bound uptake hydrogenase                                             |
| <i>bll0466</i> | <i>acnA</i>                    | -134 | 4.41 | cGgTTAGAAaGcTTCTAtAag | aconitase                                                                     |
| <i>bll5701</i> | <i>cycB-bll5700</i>            | -101 | 4.22 | AaTTTtGAAcGATTcAAtttc | cytochrome b561, glutathione S-transferase                                    |

**Expression data:** Iron- and/or Irr-regulated genes (Roudolph et al., 2006 and Yang et al., 2006)

#### **Bradyrhizobium sp. BTAi1**

|                  |                              |      |      |                       |                                                                               |
|------------------|------------------------------|------|------|-----------------------|-------------------------------------------------------------------------------|
| <i>Brad_6124</i> | <i>fhuA2-piuB2</i>           | -112 | 4.36 | gagTTtAATAATTCTAAAta  | outer membrane iron receptor, Iron-uptake factor                              |
| <i>Brad_3189</i> | <i>mbfA</i>                  | -59  | 5.86 | AcTTTAGAAgCgTTCTAAACa | membrane-bound ferritin                                                       |
| <i>Brad_5789</i> |                              | -35  | 5.16 | ttTTTAGAAcgtTTCTAAAtT | conserved hypothetical protein                                                |
| <i>Brad_3567</i> | <i>Brad_3567 - fhuA-piuB</i> | -151 | 5.07 | gaTTTgGAAccgTTCTAAAta | outer membrane iron receptor, Iron-uptake factor                              |
| <i>Brad_3512</i> | <i>feoAB</i>                 | -78  | 5.02 | tGTTTAaAATcgcTCTAAgaT | ferrous iron transporter                                                      |
| <i>Brad_2353</i> |                              | -77  | 4.97 | AaTcTAGAAgcATTcCAAtCa | probable aerotaxis receptor                                                   |
| <i>Brad_4228</i> | <i>fiu-piuC-exbBD-tonB2</i>  | -198 | 4.86 | gtTTTAGAAcGATTtcAAgtT | outer membrane iron receptor, iron uptake factor, iron transporter components |
| <i>Brad_4228</i> |                              | -156 | 4.88 | ttTTTAGAATTgTTtTgAtCT |                                                                               |
| <i>Brad_0131</i> |                              | -106 | 4.80 | AacTcAGAAcAgTTCaAAAaa | regulatory protein, similar to LuxR                                           |
| <i>Brad_1683</i> | <i>bfd-bfr</i>               | -95  | 4.38 | AGaTTgGAATAgcTtcAAAag | bacterioferritin ferredoxin, bacterioferritin                                 |
| <i>Brad_5162</i> | <i>irr</i>                   | -76  | 4.25 | AGTTTAGggcgTTCTAgAtc  | iron response regulator                                                       |
| <i>Brad_3677</i> | <i>nifHDKX</i>               | -201 | 4.25 | ccTTTtAAcGATTcAAAagc  | molybdenum-iron nitrogenase                                                   |
| <i>Brad_1627</i> | <i>Brad_1627-1626-1625</i>   | -175 | 4.21 | gccTTgGAATggcTCTAgTCT | pyridine nucleotide-disulphide oxidoreductase, ferredoxin oxidoreductase      |
| <i>Brad_3993</i> | <i>nuoEF-fdhFD-bll3134</i>   | -62  | 4.14 | taTcTtGAgcAATTcCAAttc | NAD-dependent formate dehydrogenase                                           |
| <i>Brad_3670</i> | <i>frd-sufBCDS</i>           | -109 | 4.13 | AaTTTAGAATccTcCTtAgaa | ferredoxin, FeS cluster assembly                                              |

#### **Rhodopseudomonas palustris CGA009**

|                |              |      |      |                        |                                |
|----------------|--------------|------|------|------------------------|--------------------------------|
| <i>RPA4303</i> | <i>mbfA</i>  | -33  | 5.51 | taTTTAGAAgCgTTCTAAACT  | membrane-bound ferritin        |
| <i>RPA4636</i> | <i>feoAB</i> | -78  | 5.19 | ctgTTAcAATCgTTCTAAACT  | ferrous iron transporter       |
| <i>RPA1876</i> | <i>fhuA1</i> | -222 | 4.95 | tGaTTtGAAcGATTcAAAaT   | outer membrane iron receptor   |
| <i>RPA4152</i> | <i>fbpAB</i> | -99  | 4.81 | cGgcTgGAATagTTCTAAAtCg | ferric cations ABC transporter |

|         |                               |      |      |                        |                                                                               |
|---------|-------------------------------|------|------|------------------------|-------------------------------------------------------------------------------|
| RPA3600 | <i>bfr</i>                    | -66  | 4.79 | gaTcTAGAATtATTCTAAAtc  | bacterioferritin                                                              |
| RPA0765 | <i>RPA0765</i>                | -317 | 4.74 | gGTTTtGAAgGccTCTAAAtCg | outer membrane iron receptor                                                  |
| RPA1845 | <i>fcuA3</i>                  | -266 | 4.73 | AGcTcgGAATCgTTCTAgAtT  | outer membrane iron receptor                                                  |
|         |                               | -129 | 4.43 | AcaaTAGAgTCgTTCTAAgtT  |                                                                               |
| RPA3195 | <i>iorAB</i>                  | -73  | 4.60 | AGcTTAGAcTGgTTCgAAACa  | indolepyruvate ferredoxin oxidoreductase                                      |
| RPA3480 | <i>fiu-piuC-exbBD-tonB3</i>   | -306 | 4.60 | ttcTTAGAATGATTtTgAtCT  | outer membrane iron receptor, iron uptake factor, iron transporter components |
| RPA2464 | <i>sufBCDS1XA</i>             | -101 | 4.58 | gtgcTtGAAcGgTTCTAAgag  | Fe-S cluster assembly                                                         |
| RPA1224 | <i>iorAB2-oorABC</i>          | -51  | 4.47 | ccTTTAcAgcagTTCTAAAtCg | indolepyruvate ferredoxin oxidoreductase, 2-oxoglutarate dehydrogenase        |
| RPA4430 | <i>RPA4430-piuB</i>           | -87  | 4.47 | ccgTTAGAcTGATTcCAAgCT  | outer membrane iron receptor, iron-uptake factor                              |
| RPA2307 | <i>RPA2307</i>                | -207 | 4.46 | AGAcTAGAATCtCtCaAgACT  | outer membrane iron receptor                                                  |
| RPA2308 | <i>RPA2308-2310</i>           | -48  | 4.46 | AGTcTtGAgGATTCTAgTCT   | hypothetical iron siderophore ABC transporter                                 |
| RPA3282 | <i>fecIR-hmuR2</i>            | -112 | 4.45 | cGgcTAGAgcCAaTCTAAAtc  | iron transport sigma factor and sensor, heme receptor                         |
| RPA2026 | <i>fcuA1</i>                  | -123 | 4.29 | tgcTAgAAcGgTTCTAgTgg   | ferrichrome receptor                                                          |
| RPA0489 | <i>fdx</i>                    | -26  | 4.21 | AaaTTAGAAcCgTTCcggAgc  | ferredoxin II                                                                 |
| RPA3414 | <i>fhuA2-X</i>                | -115 | 4.18 | tGTTTcGAgcaATTcCAAtCc  | outer membrane iron receptor                                                  |
| RPA2121 | <i>hmuPTUV</i>                | -86  | 4.14 | cGTTTAtAgTaATTaTAAgac  | heme ABC transporter                                                          |
| RPA2122 | <i>hemN3</i>                  | -267 | 4.14 | gtcTTAtAATtAcTaTAAACg  | paralog of oxygen-independent coproporphyrinogen III oxidase                  |
| RPA3840 | <i>fhuA3-XX</i>               | -110 | 4.13 | gacgTAGAAcGtTTgTAAAtCg | outer membrane iron receptor                                                  |
| RPA2124 | <i>hmuR1-XX-exbBD-tonB1</i>   | -163 | 4.04 | AagTTAtAATtgcTtTAAAtCa | heme uptake                                                                   |
| RPA3876 | <i>fumA</i>                   | -81  | 3.94 | cccTTAGAggtATaCTAAAtg  | fumarate hydratase class I                                                    |
| RPA2390 | <i>rhbCF-XXX-fatBDCE-fecR</i> | -112 | 3.91 | tGaTTgGttgaATTCTAAACT  | siderophore biosynthesis, ferric anguibactin ABC transporter                  |

### ***Nitrobacter winogradskyi* Nb-255**

|          |                     |      |      |                        |                                                            |
|----------|---------------------|------|------|------------------------|------------------------------------------------------------|
| Nwi_2475 | <i>bfr</i>          | -80  | 5.15 | gaTTTAGAAgtATTCTAAAtT  | bacterioferritin                                           |
| Nwi_0035 | <i>irr</i>          | -113 | 4.87 | AGTTTtGAgcCATTCTAgTtg  | iron regulatory protein Irr                                |
| Nwi_3045 | <i>fecIR-fhuA1</i>  | -62  | 4.76 | AGcTTAGAAcCAaTcCAgACa  | iron sigma factor and sensor, outer membrane iron receptor |
| Nwi_0894 | <i>fecIR-omp</i>    | -226 | 4.66 | tCtTAGAAcCAaTCTAAAtg   | iron sigma factor and sensor, outer membrane iron receptor |
| Nwi_1340 | <i>fecIR-fhuA3</i>  | -55  | 4.6  | gGTTTAGAtgCgaTCTAAAgT  | iron sigma factor and sensor, outer membrane iron receptor |
| Nwi_2582 | <i>cycA1</i>        | -169 | 4.52 | AcacTcGAATCgTTCTAAgaT  | cytochrome c class I                                       |
| Nwi_1204 | <i>glgP</i>         | -198 | 4.51 | cGcTTAaAAaCgcTCTAAgtg  | glycogen phosphorylase                                     |
| Nwi_2048 | <i>fecI1</i>        | -139 | 4.45 | cacTTAGAAgCtCtCCaAACT  | iron transport sigma factor                                |
| Nwi_2462 |                     | -140 | 4.45 | gGTTTAtAgcGtTTCaAAACg  | hypothetical protein                                       |
| Nwi_1467 |                     | -94  | 4.41 | gagaTAGAATCATTcCAAcCg  | hypothetical protein                                       |
| Nwi_0773 | <i>cycA1-narG</i>   | -144 | 4.36 | gtTTTctAAcGATTCTAgTCT  | cytochrome c class I, nitrate reductase                    |
| Nwi_0902 | <i>fecI2</i>        | -88  | 4.36 | ctcTTAaAccCATTCTAAAtc  | iron transport sigma factor                                |
| Nwi_2813 | <i>piuB-COG3656</i> | -128 | 4.35 | taTTTAGAATGAacCTAAAtCT | Iron-uptake factor, hypothetical lipoprotein               |
| Nwi_1734 | <i>fecIR-omp</i>    | -21  | 4.31 | tccTAGAATCAaTCTAgAtc   | iron sigma factor and sensor, outer membrane iron receptor |
| Nwi_2610 |                     | -81  | 4.3  | cGgTTAGAAaagTTCaAgTtg  | hypothetical protein                                       |
| Nwi_0703 | <i>exbBD-tonB2</i>  | -474 | 4.26 | AaTcTAGAAgGATTCTtAAgT  | components for TonB-dependent iron transporters            |
| Nwi_0700 | <i>fiu-piuC</i>     | -92  | 4.25 | gGTTTAGAtgaATTCTAtAaT  | outer membrane iron receptor, iron uptake factor piuC      |
| Nwi_2883 | <i>fecIR-fhuA2</i>  | -196 | 4.19 | ttcTTAaAcTCATTCTAAAta  | iron sigma factor and sensor, outer membrane iron receptor |

|          |                    |      |             |                        |                                                            |
|----------|--------------------|------|-------------|------------------------|------------------------------------------------------------|
| Nwi_3079 | <i>fecIR-fhuA4</i> | -249 | <u>4.17</u> | ttTcTAGAAcaggTCTAAAtc  | iron sigma factor and sensor, outer membrane iron receptor |
| Nwi_1966 | <i>fecI3</i>       | -562 | <u>4.06</u> | AcTTTgGAaccGgaTCTAAAtc | iron sigma factor                                          |
| Nwi_0724 | <i>fecR-fhuA5</i>  | -45  | <u>3.93</u> | cGcTTgAaaaCgcTCTAggaT  | iron sensor, outer membrane iron receptor                  |
| Nwi_2053 | <i>tonB</i>        | -279 | <u>3.91</u> | AcTTTcGAAgtATTcCaAgttT | component for TonB-dependent iron transporters             |
| Nwi_2051 | <i>fecIR-omp</i>   | -126 | <u>3.89</u> | gcaTTAGAcgCtaTCTAAACT  | iron sigma factor and sensor, outer membrane iron receptor |
| Nwi_0242 | <i>hemA</i>        | -65  | <u>3.86</u> | ccgcTgGAAaGgcTCTAAaaa  | heme biosynthesis                                          |
| Nwi_2976 | <i>feoAB</i>       | -197 | <u>3.85</u> | AcTTTttAATCATTCcAgcaa  | ferrous iron transporter                                   |

### **Nitrobacter hamburgensis X14**

|           |                       |      |             |                        |                                                       |
|-----------|-----------------------|------|-------------|------------------------|-------------------------------------------------------|
| Nham_3279 | <i>fiu2-piuC2</i>     | -245 | 5.13        | AaTTTAGAATCgTTtTAAAAa  | outer membrane iron receptor, iron uptake factor piuC |
|           |                       | -152 | 4.31        | gaTTTAGAtaGATTCaAAAAa  |                                                       |
| Nham_3277 | <i>exbBD-tonB</i>     | 2    | 5.15        | tGTTTAGAAcGcTTCTAAataa | components for TonB-dependent iron transporters       |
| Nham_3901 | <i>bfr</i>            | -95  | 5.05        | gaTTTAGAAgCATTCTAAgaa  | bacterioferritin                                      |
| Nham_3555 | <i>fhuA</i>           | -177 | 4.96        | AaTTTAGAAcGATTaaAAAatg | outer membrane iron receptor                          |
|           |                       | -124 | 4.27        | AaTaTtGAtctATTCTAAACg  |                                                       |
| Nham_2133 | <i>feoAB</i>          | -61  | 4.85        | taTTTttAAcCATTCTAAatCT | ferrous iron transporter                              |
| Nham_1013 | <i>irr</i>            | -105 | 4.83        | AGTTTgGAgcCgTTCTAgttg  | iron regulatory protein Irr                           |
| Nham_3637 | <i>cycA1</i>          | -164 | 4.63        | AtgcTcGAATCATTCTAAgaT  | cytochrome c class I                                  |
| Nham_2257 |                       | -90  | 4.55        | cagcTAGAATCATTcCagttT  | hypothetical lipoprotein                              |
| Nham_4206 | <i>cycB</i>           | -121 | 4.48        | ctcTTAGAtgGATTcCAAtCa  | cytochrome b561                                       |
| Nham_1606 | <i>piuB2</i> -COG3656 | -148 | 4.41        | AGTTTAGAgcGAacCTAAatCT | Iron-uptake factor, hypothetical lipoprotein          |
| Nham_1610 | <i>fiu1-piuC1</i>     | -138 | <u>4.17</u> | gagcTAGAAcCtcTgTAAACT  | outer membrane iron receptor, iron uptake factor piuC |
| Nham_1611 | <i>exbBD-tonB2</i>    | -125 | 4.33        | gtTTTAaAgaGATTCTAAaac  | components for TonB-dependent iron transporters       |
| Nham_2255 | <i>fcuA1-piuB</i>     | -102 | 4.32        | gacTTAGAtcGATTCTActtc  | outer membrane iron receptor, Iron-uptake factor      |
| Nham_1436 | <i>cycA2-narG</i>     | -143 | 4.22        | gcTTTctAAcGATTCTAgctCT | cytochrome c class I, nitrate reductase               |
| Nham_4406 | <i>hemA</i>           | -67  | <u>4.19</u> | cGgcTgGAAaGgcTCTAAaaa  | heme biosynthesis                                     |

### **Rhodobacter sphaeroides**

|          |             |     |             |                       |                         |
|----------|-------------|-----|-------------|-----------------------|-------------------------|
| RSP_0850 | <i>mbfA</i> | -30 | 5.72        | AaTTTAGAATGAcTCTAAaaa | membrane-bound ferritin |
| RSP_2395 | <i>ccpA</i> | -86 | <u>4.81</u> | AGaTTAGAAAtgaTCTAAgtc | cytochrome c peroxidase |

### **Rhodobacter capsulatus**

|          |             |     |      |                       |                         |
|----------|-------------|-----|------|-----------------------|-------------------------|
| RRC04069 | <i>mbfA</i> | -28 | 5.55 | AtgTTgGAATCATTCTAAACT | membrane-bound ferritin |
| RRC03475 | <i>ccpA</i> | -44 | 5.15 | tGTTTAGAAgtATTcCAAtT  | cytochrome c peroxidase |

### **Silicibacter pomeroyi**

|         |                     |      |      |                        |                                    |
|---------|---------------------|------|------|------------------------|------------------------------------|
| SPO3842 | <i>mbfA</i>         | -33  | 5.68 | AtcTTgGAATCATTCTAAAtT  | membrane-bound ferritin            |
| SPO0382 | <i>fssA</i>         | -75  | 5.62 | tcTTTAGAAcCgTTcCAAAgT  | hypothetical Fe-S scaffold protein |
| SPO2025 | <i>iscR-sufSBCD</i> | -120 | 5.19 | AtcTTAGAATGgTTCTAAgtc  | Fe-S cluster assembly              |
| SPO0330 | <i>ccpA</i>         | -73  | 5.11 | AtgTTAGAATGATTCTAAAtCg | cytochrome c peroxidase            |

### **Silicibacter sp. TM1040**

|             |                     |      |      |                        |                                    |
|-------------|---------------------|------|------|------------------------|------------------------------------|
| TM1040_3091 | <i>fssA</i>         | -75  | 5.64 | AaTTTAGAAaccATTcCAAAac | hypothetical Fe-S scaffold protein |
| TM1040_1240 | <i>iscR-sufSBCD</i> | -118 | 5.61 | AccTTAGAActgTTCTAAAgA  | Fe-S cluster assembly              |
| TM1040_2791 | <i>katG</i>         | -145 | 5.52 | AacTTAGAATAATTCTgAACT  | Catalase (peroxidase I)            |

### **Jannaschia sp. CC51**

|                                           |                     |      |             |                        |                                                                                 |
|-------------------------------------------|---------------------|------|-------------|------------------------|---------------------------------------------------------------------------------|
| Jann_0865                                 | <i>fssA</i>         | -78  | <u>4.84</u> | AcTTTAGAAcGATTcCagttc  | hypothetical Fe-S scaffold protein                                              |
| Jann_3276                                 | <i>dps</i>          | -124 | 6.11        | AGTTTAGAATTATTCTAgACa  | DNA-binding ferritin-like protein Dps                                           |
| Jann_2366                                 | <i>iscR-sufSBCD</i> | -136 | 5.14        | AcccTAGAAcGATTcCAAAtT  | Fe-S cluster assembly                                                           |
| <b>Rhodobacterales bacterium HTCC2654</b> |                     |      |             |                        |                                                                                 |
| RB2654_18613                              | <i>fssA</i>         | -53  | <u>4.81</u> | gacTTgGAAcGATTcCAAgCT  | hypothetical Fe-S scaffold protein                                              |
| RB2654_16991                              | <i>mbfA</i>         | -31  | 5.84        | AGTTTgGAATcgTTCcAAACa  | membrane-bound ferritin                                                         |
| RB2654_13154                              | <i>irpA-bfd-bfr</i> | -45  | 5.36        | tGaTTgGAAccATTcCAAAtT  | iron-regulated protein A (Vibrio),bacterioferritin ferredoxin, bacterioferritin |
| <b>Roseobacter sp. MED193</b>             |                     |      |             |                        |                                                                                 |
| MED193_04321                              | <i>iscR-sufSBCD</i> | -123 | 5.25        | AtcTTAGAAcAATTCTAAAtg  | Fe-S cluster assembly                                                           |
| MED193_04676                              | <i>ahpC</i>         | -58  | 5.3         | AaTTTAGAAcTATTaTAAAtg  | peroxiredoxin/glutaredoxin family protein                                       |
| MED193_10358                              | <i>fssA</i>         | -76  | 6.22        | AaTTTAGAATAATTCTAAACc  | hypothetical Fe-S scaffold protein                                              |
| <b>Roseovarius sp. 217</b>                |                     |      |             |                        |                                                                                 |
| ROS217_20542                              | <i>iscR-sufSBCD</i> | -99  | 5.84        | AccTTAGAAcTgTTCTAAAtT  | Fe-S cluster assembly                                                           |
| ROS217_10487                              | <i>fssA</i>         | -77  | 5.7         | AtcTTAGAATggTTCTAAACc  | hypothetical Fe-S scaffold protein                                              |
| ROS217_11126                              | <i>mbfA</i>         | -31  | 6.16        | AGTTTAGAATTATTCTAAAg   | membrane-bound ferritin                                                         |
| ROS217_11501                              | <i>ccpA</i>         | -76  | 5.42        | gaTTTAGAATggTTCcAAACg  | cytochrome c peroxidase                                                         |
| <b>Roseovarius nubinhibens ISM</b>        |                     |      |             |                        |                                                                                 |
| ISM_02850                                 | <i>fssA</i>         | -76  | 5.47        | ttTTTAGAATcgTTCcAAAtc  | hypothetical Fe-S scaffold protein                                              |
| ISM_08740                                 | <i>mbfA</i>         | -38  | 5.76        | AGTTTAGAATcATTCTAAAtg  | membrane-bound ferritin                                                         |
| ISM_16015                                 | <i>iscR-sufSBCD</i> | -128 | 6.18        | AcTTTAGAAcTgTTCTAAACa  | Fe-S cluster assembly                                                           |
| ISM_16225                                 | <i>katG</i>         | -93  | <u>4.64</u> | cGcTTAGAAcGATTcCAAggc  | catalase (peroxidase I)                                                         |
| <b>Loktanelia vestfoldensis SKA53</b>     |                     |      |             |                        |                                                                                 |
| SKA53_14166                               | <i>mbfA</i>         | -33  | 5.97        | AGaTTAGAATcATTCTAAAta  | membrane-bound ferritin                                                         |
| SKA53_14701                               | <i>fssA</i>         | -77  | 5.8         | AGTTTAGAATcgTTCcAAAtc  | hypothetical Fe-S scaffold protein                                              |
| SKA53_05183                               | <i>iscR-sufSBCD</i> | -110 | 5.74        | AccTTAGAAggATTCTAAACT  | Fe-S cluster assembly                                                           |
| SKA53_02751                               | <i>hemA</i>         | -63  | <u>4.14</u> | AGaTTAGAAcGATTcCagggCg | heme biosynthesis                                                               |
| SKA53_14466                               | <i>katG</i>         | -84  | <u>4.77</u> | AtgTTAGAAggATTCTAAgCg  | catalase (peroxidase I)                                                         |
| <b>Sulfitobacter sp. EE-36</b>            |                     |      |             |                        |                                                                                 |
| EE36_14302                                | <i>iscR-sufSBCD</i> | -117 | 5.69        | AGTTTAGAAcggTTCTAAActT | Fe-S cluster assembly                                                           |
| EE36_14417                                | <i>hemA</i>         | -102 | <u>4.73</u> | tGaaTtGAATggcTCTAAACT  | heme biosynthesis                                                               |
| EE36_01790                                | <i>dps</i>          | -117 | 6.1         | AGTTTAGAATAATTcCAAAaa  | DNA-binding ferritin-like protein Dps                                           |
| EE36_09510                                | <i>fssA</i>         | -75  | 5.44        | AacTTAGAATcgTTCcAAACc  | hypothetical Fe-S scaffold protein                                              |
| EE36_11399                                | <i>katG</i>         | -111 | <u>4.43</u> | ctgTTAGAAcAATTcCAgAaa  | catalase (peroxidase I)                                                         |
| <b>Oceanicola batsensis HTCC2597</b>      |                     |      |             |                        |                                                                                 |
| OB2597_06815                              | <i>bfr</i>          | -84  | 5.95        | ttTTTgGAATAATTCTAAAtT  | bacterioferritin                                                                |
| OB2597_10089                              | <i>fssA</i>         | -80  | 5.19        | gaaTTAGAAcggTTCTAAAtc  | hypothetical Fe-S scaffold protein                                              |
| OB2597_01932                              | <i>hemA</i>         | -92  | <u>4.21</u> | gacTTAaAAccATTcCAAttc  | heme biosynthesis                                                               |
| OB2597_03589                              | <i>iscR-sufSBCD</i> | -113 | <u>4.93</u> | AccTTAGAAagATTCTAAAgc  | Fe-S cluster assembly                                                           |
| OB2597_11886                              | <i>katG</i>         | -64  | <u>4.25</u> | gtgTTAGATgATTCTAAAgg   | catalase (peroxidase I)                                                         |
| <b>Pelagibacter ubique HTCC1002</b>       |                     |      |             |                        |                                                                                 |
| PU1002_04356                              | <i>rbr</i>          | -76  | 5.74        | AcaTTAaAATAATTCTAAACT  | Rubrerythrin                                                                    |

|                                              |               |      |      |                       |                         |
|----------------------------------------------|---------------|------|------|-----------------------|-------------------------|
| PU1002_04361                                 | <i>irr</i>    | -23  | 5.88 | AGTTTAGAATTATTaTAAACa | iron regulatory protein |
| <b>Rhodospirillum rubrum ATCC11170</b>       |               |      |      |                       |                         |
| Rru_A0038                                    | <i>ccmCDE</i> | -161 | 5.46 | TTTCTgGAAgAcTTCcAGAtA | heme export             |
| Rru_A1789                                    | <i>ccpA</i>   | -97  | 4.61 | TTcCTAGAgcAATTcCAtAt  | cytochrome c peroxidase |
| <b>Magnetospirillum magneticum AMB-1</b>     |               |      |      |                       |                         |
| amb2822                                      | <i>ccpA</i>   | -163 | 5.24 | gagtTAGAAgAATTCTAaAtA | cytochrome c peroxidase |
| <b>Magnetospirillum magnetotacticum MS-1</b> |               |      |      |                       |                         |
| Magn03010382                                 | <i>rbr</i>    | -112 | 5.02 | aaTCTcGAATTAaTCgAtAAA | Rubrerythrin            |

**Color code for functional roles of genes:**

**Genes involved in iron uptake**

**Genes involved in iron storage**

**Genes involved in iron utilization pathways (synthesis of Fe-S, heme; iron-containing enzymes)**

**Transcription factors (*rirA*, *araX*, *feclR*, *irr*)**

**Genes with other or uncertain functional roles**
