# Supplementary material
Source: PubMed Central journal article supplement (PMC1764042)
Supplement: pcbi.0020163.st004.pdf [file pcbi.0020163.st004.pdf]

Suppl. Table S4. The Mur regulon in alpha-proteobacteria

| Locus ID                                         | Operon         | Positio | Score       | site                  | Function                    |
|--------------------------------------------------|----------------|---------|-------------|-----------------------|-----------------------------|
| <b><i>Sinerhizobium meliloti</i></b>             |                |         |             |                       |                             |
| SMc02509                                         | <i>sitABCD</i> | -81     | 5.38        | gTTGCAAATGcTTctCAtT   | Manganese ABC transporter   |
| <b><i>Mesorhizobium sp. BNC1</i></b>             |                |         |             |                       |                             |
| MBNC03003615                                     | <i>mntH</i>    | -39     | 5.22        | AaTGCAAATaAgTcGCAAac  | Manganese permease          |
| MBNC03001420                                     | <i>sitABCD</i> | -114    | 5.73        | gTTGCAAATGgTTTGCAAT   | Manganese ABC transporter   |
| <b><i>Rhizobium leguminosarum</i></b>            |                |         |             |                       |                             |
| RL0940                                           | <i>mntH</i>    | -67     | 5.66        | gTTGCgAATGAcTTGCAtT   | Manganese permease          |
| RL3884                                           | <i>sitABCD</i> | -139    | <u>4.65</u> | gTTGCAATTCATTcttAAT   | Manganese ABC transporter   |
|                                                  |                | -85     | 5.37        | tTTGCAAATCATTctgAAT   |                             |
| <b><i>Rhizobium etli</i></b>                     |                |         |             |                       |                             |
| RHE_CH00878                                      | <i>mntH</i>    | -67     | 5.66        | gTTGCgAATGAcTTGCAtT   | Manganese permease          |
| <b><i>Agrobacterium tumefaciens</i></b>          |                |         |             |                       |                             |
| AGR_L_798                                        | <i>sitABCD</i> | -77     | 6.01        | ATTGagAATGATTTGCAAT   | Manganese ABC transporter   |
|                                                  |                | -25     | <u>4.84</u> | ATTGCgAgTtAaTcGCAAac  |                             |
| AGR_C_3186                                       | <i>mntH</i>    | 9       | 5.66        | taTGagAATGATTTGCAAT   | Manganese permease          |
| <b><i>Brucella melitensis</i></b>                |                |         |             |                       |                             |
| BMEI0569                                         | <i>mntH</i>    | -43     | 5.29        | AaTGCAAATagTTTGCAAac  | Manganese permease          |
| BMEI1563                                         | <i>irr1</i>    | -201    | 5.90        | ATTGCAAACATTGCAAT     | iron regulatory protein Irr |
| <b><i>Bartonella quintana</i></b>                |                |         |             |                       |                             |
| BQ00790                                          | <i>sitABCD</i> | -34     | 5.82        | AaTGCAAATCATTgGCAAT   | Manganese ABC transporter   |
| <b><i>Bradyrhizobium japonicum</i></b>           |                |         |             |                       |                             |
| blr5044                                          | <i>mntH</i>    | -45     | 5.74        | gTTGCAAATGAgTTGCAAT   | Manganese permease          |
| blI0768                                          | <i>irr1</i>    | -78     | <u>4.34</u> | gTTGCgAgaaAcTTGCAtc   | iron regulatory protein Irr |
| <b><i>Bradyrhizobium sp. BTAi1</i></b>           |                |         |             |                       |                             |
| Brad_4860                                        | <i>mntH1</i>   | -46     | 5.12        | cTTGCAAATaAgTTGCAtT   | Manganese permease          |
| <b><i>Rhodopseudomonas palustris</i></b>         |                |         |             |                       |                             |
| RPA2706                                          | <i>mntH</i>    | -48     | 5.70        | ATTGCAAATGAcTTGCAAag  | Manganese permease          |
| RPA0424                                          | <i>irr1</i>    | -84     | <u>4.33</u> | gTTGCgAAgCgcTTGCAcc   | iron regulatory protein Irr |
| <b><i>Nitrobacter winogradskyi</i></b>           |                |         |             |                       |                             |
| Nwi_1912                                         | <i>mntH</i>    | -52     | 5.7         | tTTGCAAATGAgTTGCAAT   | Manganese permease          |
| Nwi_0035                                         | <i>irr</i>     | -96     | <u>4.6</u>  | gTTGCgAAaaAcTTGCAtc   | iron regulatory protein Irr |
| <b><i>Nitrobacter hamburgensis X14</i></b>       |                |         |             |                       |                             |
| Nham_0774                                        | <i>mntH</i>    | -49     | 5.09        | tTTGCAAAGTGAgTTGCAAag | Manganese permease          |
| Nham_1013                                        | <i>irr</i>     | -88     | <u>4.6</u>  | gTTGCgAAaaAcTTGCAtc   | iron regulatory protein Irr |
| <b><i>Rhodobacter sphaeroides</i></b>            |                |         |             |                       |                             |
| RSP_0904                                         | <i>sitABCD</i> | -8      | 5.22        | tTTGCgAATGccTcGCAtT   | Manganese ABC transporter   |
| <b><i>Silicibacter pomeroyi</i></b>              |                |         |             |                       |                             |
| SPO3366                                          | <i>sitABCD</i> | -83     | 5.28        | cTTGCgAATaATTctCAAT   | Manganese ABC transporter   |
|                                                  |                | -52     | 5.00        | gTTGCgAATGgTTctCAta   |                             |
| SPOA0445                                         | <i>irr</i>     | -77     | <u>4.13</u> | gaTGagAATGAaaTtCAtT   | iron regulatory protein Irr |
| <b><i>Silicibacter sp. TM1040</i></b>            |                |         |             |                       |                             |
| TM1040_0098                                      | <i>sitABCD</i> | -96     | <u>4.49</u> | tgTGagAATaATTctCAtT   | Manganese ABC transporter   |
|                                                  |                | -65     | <u>4.68</u> | gTTGCgAAgCgTTctCAta   |                             |
| TM1040_0183                                      | <i>irr</i>     | -74     | <u>4.52</u> | tTTGCAAATCcgTTtgAAa   | iron regulatory protein Irr |
| <b><i>Jannaschia sp. CC51</i></b>                |                |         |             |                       |                             |
| Jann_2080                                        | <i>sitABCD</i> | -87     | 5.01        | tTTGCAAcTCAcTcGCAAag  | Manganese ABC transporter   |
| Jann_1136                                        | <i>irr</i>     | 43      | <u>4.61</u> | tTTGCAAAGaccTcGCAAaa  | iron regulatory protein Irr |
| <b><i>Sulfitobacter sp. EE-36</i></b>            |                |         |             |                       |                             |
| EE36_12418                                       | <i>sitABCD</i> | -111    | 4.96        | taTGCgAcTaATTcGCAtT   | Manganese ABC transporter   |
| <b><i>Rhodobacterales bacterium HTCC2654</i></b> |                |         |             |                       |                             |
| RB2654_19543                                     | <i>sitABCD</i> | -166    | 5.57        | gTTGCAAATGATTTGCAcT   | Manganese ABC transporter   |
|                                                  |                | -118    | 5.31        | gTTGCAATTCATTcGCAAac  |                             |
| <b><i>Loktanella vestfoldensis SKA53</i></b>     |                |         |             |                       |                             |
| SKA53_08116                                      | <i>sitABCD</i> | -64     | 4.89        | gTTGCgAAcGcTTctCAtT   | Manganese ABC transporter   |

**Roseobacter sp. MED193**

|                                       |                |     |             |                     |                             |
|---------------------------------------|----------------|-----|-------------|---------------------|-----------------------------|
| MED193_12968                          | <b>sitABCD</b> | -86 | 5.1         | gTTGagAATaATTctCAtT | Manganese ABC transporter   |
|                                       |                | -55 | <u>4.78</u> | gTTGagAATCgTTctCAta |                             |
| MED193_17849                          | <i>irr</i>     | -41 | 4.94        | AaTGCAAtTCATTcGCAgT | iron regulatory protein Irr |
| <b>Roseovarius sp.217</b>             |                |     |             |                     |                             |
| ROS217_05129                          | <b>sitABCD</b> | -27 | 5.11        | gTTGCgAATaATTctCAta | Manganese ABC transporter   |
| <b>Roseovarius nubinhibens ISM</b>    |                |     |             |                     |                             |
| ISM_02005                             | <i>mntX*</i>   | -30 | 5.63        | ATTGagAATaATTcGCAAT | predicted Mn transporter    |
| <b>Oceanicola granulosus HTCC2516</b> |                |     |             |                     |                             |
| OG2516_13601                          | <i>mntX*</i>   | -38 | 5.85        | ATTGCgAATtATTcGCAAT | predicted Mn transporter    |
| <b>Oceanicola batsensis HTCC2597</b>  |                |     |             |                     |                             |
| OB2597_13568                          | <b>sitABCD</b> | -92 | 5.43        | gTTGCgAATGgTTcGCAtT | Manganese ABC transporter   |
|                                       |                | -61 | 5.26        | gTTGCgAATGgTTcGCAtc |                             |
