# Supplementary material
Source: PubMed Central journal article supplement (PMC1764042)
Supplement: pcbi.0020163.st005.pdf [file pcbi.0020163.st005.pdf]

Suppl. Table S5. The MntR regulon in alpha-proteobacteria

| Organism                                     | Locus ID     | Operon       | Position | Score | site                 | Function                         |
|----------------------------------------------|--------------|--------------|----------|-------|----------------------|----------------------------------|
| <i>Mesorhizobium loti</i>                    | mlr2501      | <i>mntH</i>  | -196     | 5.98  | TTTATAGCaCGGGCTcTgAt | NRAMP-type Mn transporter / mntR |
| <i>Mesorhizobium</i> sp. BNC1                | MBNC03003581 | <i>mntR</i>  | -47      | 5.79  | TccATAGCCgaGGCTATAAt | mntR                             |
| <i>Rhodobacter capsulatus</i>                | 5_0455       | <i>mntH</i>  | -48      | 6.44  | AATaTAGCCAaGGCTACAcT | NRAMP-type Mn transporter        |
| <i>Magnetospirillum magnetotacticum</i> MS-1 | Magn03007105 | <i>mntH</i>  | -129     | 6.04  | TTTATAGCtCatGCTATAAc | NRAMP-type Mn transporter / mntR |
| <i>Bradyrhizobium</i> sp. BTAi1              | Brad_2341    | <i>mntH2</i> | -91      | 5.81  | AATGTAGCagaaGCTAtATc | NRAMP-type Mn transporter        |
