# Supplementary material
Source: PubMed Central journal article supplement (PMC1764042)
Supplement: pcbi.0020163.st006.pdf [file pcbi.0020163.st006.pdf]

Suppl. Table 6. The Fur regulon in alpha-proteobacteria

| Locus ID                              | Operon            | Position | Score       | Fur-box                       | Function                                         |
|---------------------------------------|-------------------|----------|-------------|-------------------------------|--------------------------------------------------|
| <b><i>Caulobacter crescentus</i></b>  |                   |          |             |                               |                                                  |
| CC2928                                | <i>OMP1</i>       | -32      | 5.85        | ATTGCGACgCACTCGCAAT           | TonB-dependent receptor                          |
| CC0028                                | <i>OMP2-piuC</i>  | 149      | 5.33        | ATTGCGACGGCGcCGCAAc           | TonB-dependent receptor, iron uptake factor piuC |
| CC0139                                | <i>OMP3</i>       | -97      | 5.42        | ATTGCaAGTCAGTCGCAtc           | iron(III) dicitrate receptor fecA                |
| CC2194                                | <i>OMP4</i>       | -44      | 5.10        | gTTGCGAGcCAATCGCAtg           | TonB-dependent receptor                          |
| CC2367                                |                   | -130     | 5.05        | tTTGCGAtTGA <b>CTCGCAAT</b>   | hypothetical protein                             |
|                                       |                   | -96      | 4.82        | cTTGCGAagCA <b>TCTCAA</b> g   |                                                  |
| CC3263                                | <i>bfd-bfr</i>    | -375     | 4.82        | gaTGaGAaTGACa <b>CtCAAT</b>   | bacterioferritin                                 |
| CC0155                                |                   | -31      | <u>4.45</u> | ATTGaGAacCA <b>TCTCAA</b> a   | COG3205:short transmembrane protein              |
| CC0711                                | <i>feoAB</i>      | -144     | <u>4.05</u> | AcTGatAaTCgtTCG <b>CAAT</b>   | Fe2+ transport system                            |
| CC3059                                | <i>piuB</i>       | -63      | <u>4.23</u> | ATTGCaAtTCgtT <b>CTCAA</b> g  | iron-uptake factor                               |
| <b><i>Zymomonas mobilis</i></b>       |                   |          |             |                               |                                                  |
| ZMO0795                               | <i>OMP1</i>       | -136     | 5.99        | ATTGAaAATCAaTAT <b>CAAT</b>   | probable iron transport receptor                 |
| ZMO1631                               | <i>OMP2</i>       | -74      | 5.88        | ATTGAcAATCAaTAT <b>CAAT</b>   | TonB-dependent receptor                          |
| ZMO0318                               |                   | -125     | 5.57        | AgTGATAtTGATTtT <b>CAAa</b>   | dehydrogenase/reductase family                   |
| ZMO1851                               | <i>nifF</i>       | -89      | 5.48        | ATTGATAtTGATaAT <b>CA</b> tT  | flavodoxin                                       |
| ZMO0188                               | <i>OMP3</i>       | -209     | 5.36        | taTGATAtTGATTt <b>gCAAT</b>   | ferric-pseudobactin receptor                     |
| ZMO1495                               |                   | -132     | 5.24        | ATTGATAtTGATTATt <b>AtT</b>   | conserved hypothetical protein                   |
| ZMO1822                               | <i>OMP4</i>       | -79      | 5.21        | tgTGATAtTGATT <b>cTCA</b> tT  | TonB-dependent receptor                          |
| ZMO0022                               |                   | -237     | 5.17        | AaTGAAaAATCtTTAT <b>CA</b> tT | Fe-S oxidoreductase                              |
| ZMO1860                               |                   | -159     | 4.97        | tTTGATAtTGATTATt <b>AcT</b>   | nodulin 21 like protein                          |
| ZMO1540                               | <i>feoAB</i>      | -159     | 4.94        | ATTGATAAgCAgTt <b>gCA</b> tT  | Fe2+ transport system                            |
| ZMO1753                               | <i>fpr</i>        | -274     | 4.79        | ATTGAgAtTtATT <b>cgCAA</b> a  | ferredoxin-NADP reductase                        |
| ZMO1263                               | <i>adhA</i>       | -240     | 4.78        | tTTGcaAATGATTtT <b>AtT</b>    | alcohol dehydrogenase I                          |
| ZMO1410                               | <i>bfr</i>        | -370     | 4.78        | ATTGATAcTtgTTAT <b>CA</b> tT  | bacterioferritin                                 |
| ZMO0031                               | <i>OMP5</i>       | -233     | <u>4.59</u> | tTcGATAtT <b>CcTatTCAAT</b>   | TonB-dependent receptor                          |
| <b><i>Gluconobacter oxydans</i></b>   |                   |          |             |                               |                                                  |
| GOX0536                               | <i>OMP1</i>       | -145     | 6.22        | AATGAGAATCATTt <b>gCATT</b>   | Hydroxamate-type ferrisiderophore receptor       |
| GOX0532                               | <i>exbBD-tonB</i> | -59      | 6.04        | AgTGAGAATGAcT <b>CTCATT</b>   | components for TonB-dependent iron transporters  |
| GOX1246                               | <i>OMP2</i>       | -100     | 5.89        | AATGAGAATCtT <b>TcGCAaT</b>   | TonB-dependent receptor                          |
|                                       |                   | -67      | 5.45        | AtTGAGAATtAg <b>TCgCATT</b>   |                                                  |
| GOX0673                               | <i>feoAB</i>      | -106     | 5.79        | gATGcaAATCATT <b>CTCA</b> cT  | Fe2+ transport system                            |
| GOX0641                               | <i>OMP3</i>       | -58      | 5.62        | gtTGAGAATaATTa <b>TCATT</b>   | Hydroxamate-type ferrisiderophore receptor       |
| GOX1417                               | <i>OMP4</i>       | -60      | 5.28        | gtTGcGAATaAc <b>TCgCATT</b>   | Ferrichrome receptor FcuA                        |
| <b><i>Erythrobacter litoralis</i></b> |                   |          |             |                               |                                                  |
| ELI2992                               | <i>feoAB</i>      | -46      | 5.75        | ATTGaGAATGAgTT <b>GCAAT</b>   | Fe2+ transport system                            |

|                                                 |                           |      |      |                      |                                                                             |
|-------------------------------------------------|---------------------------|------|------|----------------------|-----------------------------------------------------------------------------|
| ELI2950                                         | <i>OMP1</i>               | -65  | 5.59 | ATTGCGAcTtATTCTCAAT  | TonB-dependent receptor                                                     |
|                                                 |                           | -31  | 4.55 | ATcGaGAATCgTTCGCAAg  |                                                                             |
| ELI2144                                         | <i>OMP2</i>               | -61  | 5.17 | ATTGCGAATacgTCTCAAT  | outer membrane receptor for Fe <sup>3+</sup> -dicitrate                     |
| ELI1365                                         |                           | -126 | 5.06 | gTTGCAAcTCATTCTCaT   | no hits, small CDS                                                          |
| ELI2069                                         | <i>hemA</i>               | -71  | 4.95 | gaTGCGAATCATTTCGCAAA | haem biosynthesis                                                           |
| ELI0967                                         | <i>COG3182</i>            | -46  | 4.9  | gTTGCAAgTGATTatCaT   | uncharacterized iron-regulated membrane protein                             |
| ELI2935                                         | <i>OMP3</i>               | -243 | 4.8  | AaaGCAAgTCAGTTtCAAT  | TonB-dependent receptor                                                     |
| ELI1371                                         |                           | -30  | 4.78 | ATcGCGAcTGcTTCGCGAT  | hypothetical protein                                                        |
| ELI0014                                         | <i>OMP4</i>               | -235 | 4.71 | ATTGctgATcTTaGCAAA   | TonB-dependent receptor                                                     |
| ELI0267                                         | <i>exbBD-tonB</i>         | -8   | 4.57 | cTcGCAAATGATTatCgAa  | components for TonB-dependent iron transporters                             |
| ELI2812                                         | <i>bfd-bfr</i>            | -31  | 4.29 | cTTGCGAATCAcTCGCAgg  | bacterioferritin                                                            |
| <b><i>Novosphingobium aromaticivorans</i></b>   |                           |      |      |                      |                                                                             |
| Saro02000513                                    | <i>OMP1</i>               | -34  | 5.08 | AgTGCGAtTGAgTCGCAaT  | TonB-dependent receptor                                                     |
|                                                 |                           | -6   | 4.27 | ctTGCGAATGATTatCgTg  |                                                                             |
| Saro02001528                                    | <i>OMP2-fegB</i>          | -82  | 4.89 | AATGCGAATGATTCTtAgT  | TonB-dependent receptor, iron-uptake factor                                 |
|                                                 |                           | -53  | 4.31 | ctTGaGAACGAcTCGCAcT  |                                                                             |
| Saro02002319                                    | <i>feoAB</i>              | -46  | 4.89 | AtTGCGAAcGAcTTGCAaT  | Fe <sup>2+</sup> transport system                                           |
| Saro02003622                                    | <i>OMP3</i>               | -153 | 4.53 | AATGCAAtTGggcaGCATT  | TonB-dependent receptor                                                     |
| Saro02003557                                    | <i>OMP4</i>               | -228 | 4.28 | tAcGCAAATGATTTtCgca  | TonB-dependent receptor                                                     |
| <b><i>Rhodospirillum rubrum ATCC11170</i></b>   |                           |      |      |                      |                                                                             |
| Rru_A2597                                       | <i>ptr2-chpA2-COG2837</i> | -63  | 5.61 | AtTGATAATTAaTCTCATT  | High-affinity Fe <sup>2+</sup> transport component and permease, peroxidase |
| Rru_A0841                                       | <i>araX3</i>              | -180 | 5.41 | AAcGATAATTAaTATCATT  | siderophore uptake AraC-type regulator                                      |
| Rru_A2799                                       | <i>Rru_A2799-2796</i>     | -199 | 5.28 | AATGAaAgTCATTcGCAaT  | COG0581: ABC-type phosphate transport system                                |
| Rru_A2763                                       |                           | -96  | 5.19 | AATGAGAgTGATTCTCATg  | Putative diguanylate cyclase/phosphodiesterase                              |
| Rru_A0880                                       | <i>OMP2</i>               | -170 | 5.07 | AAcGAGAcTTATTAgCAaT  | TonB-dependent receptor                                                     |
| Rru_A2321                                       |                           | -59  | 5.07 | AATGcTAtTGAaTATCgaT  | chemotaxis protein                                                          |
| Rru_A1054                                       | <i>amb3711</i>            | -119 | 4.97 | AAcGATtATCAaTAgCATT  | hypothetical protein                                                        |
| Rru_A0879                                       | <i>araX2</i>              | -99  | 4.94 | AtTGcaAATGAcTtgCAaT  | siderophore uptake AraC-type regulator                                      |
| Rru_A1438                                       | <i>fecIR1 -OMP1</i>       | -59  | 4.85 | ttTGcGAATAATTCTCAaa  | iron transport sigma factor and sensor, TonB-dependent receptor             |
| Rru_A0845                                       | <i>OMP7-fegB</i>          | -131 | 4.85 | tATGATAATAAgaAgCATT  | TonB-dependent receptor, iron-uptake factor                                 |
| Rru_A2196                                       | <i>bfd-bfr</i>            | -74  | 4.74 | AATGcGAtTGAcTtgCAaa  | COG2906: Bacterioferritin-associated ferredoxin, bacterioferritin           |
| Rru_A1456                                       | <i>araX1</i>              | -114 | 4.61 | cATGAGAcgCATTtTCATT  | siderophore uptake AraC-type regulator                                      |
| Rru_A2155                                       | <i>exbBD-tonB</i>         | -196 | 4.48 | AtTaATAgTCAaTtgCATT  | iron transport components                                                   |
| Rru_A0769                                       | <i>fbpABC</i>             | -77  | 4.45 | tcTGcGttTCATTCTCAaT  | ferric cations ABC transporter                                              |
| Rru_A2372                                       | <i>fecIR4 -OMP4</i>       | 18   | 4.43 | AATGcGAAGcGTTtgCATT  | iron transport sigma factor and sensor, TonB-dependent receptor             |
| Rru_A2397                                       | <i>fecIR2</i>             | -102 | 4.4  | AATGATAgTCgTTCGCAaa  | iron transport sigma factor and sensor                                      |
| Rru_A2809                                       | <i>ptr-chpA</i>           | -60  | 4.35 | AATGAaAATGcaTggCtTT  | High-affinity Fe <sup>2+</sup> transport component and permease             |
| Rru_A2395                                       | <i>OMP5-piuB</i>          | -52  | 4.34 | cATGcGAACAAgTCgCATT  | TonB-dependent receptor, iron-uptake factor                                 |
| <b><i>Magnetospirillum magneticum AMB-1</i></b> |                           |      |      |                      |                                                                             |

|                |                                          |      |             |                      |                                                                                     |
|----------------|------------------------------------------|------|-------------|----------------------|-------------------------------------------------------------------------------------|
| <i>amb1811</i> |                                          | -35  | 5.99        | AtTGCGAGTCAtTCGCATT  | hypothetical protein, predicted transcriptional regulator                           |
| <i>amb3711</i> |                                          | -39  | 5.99        | AtTGCGAGTAAAtTCGCATT | hypothetical protein, ortholog of Rrub02001888                                      |
| <i>amb1662</i> | <i>~irr - bfr1-bfr2</i>                  | -33  | 5.58        | gtTGCGAGTAAaTCGCAaT  | regulator, bacterioferritin                                                         |
| <i>amb1681</i> | <i>ptr2</i>                              | -70  | 5.42        | AATGCGAGcTAtTtGCAaT  | High-affinity Fe <sup>2+</sup> permease                                             |
| <i>amb1008</i> |                                          | -38  | 5.22        | gATGCGAtTTgtTCGCAaT  | unknown hypothetical short ORF                                                      |
| <i>amb3013</i> | <i>cycC -nirB-nrfAB</i>                  | -154 | 5.22        | gtTGCGAtcGAtTCGCATT  | cytochrome, nitrite reductase                                                       |
| <i>amb0918</i> |                                          | -175 | 5.18        | gATGCaAGTTAaTCGCAac  | CheY-like receiver                                                                  |
| <i>amb4411</i> | <i>chpA1-oprB1- COG0348</i>              | -2   | 5.88        | AATGCGAGTCACTtGCATT  | protein involved in high-affinity Fe <sup>2+</sup> transport, porin, polyferredoxin |
| <i>amb0954</i> | <i>mms6-mms7-mms13</i>                   | -174 | 4.94        | cATGCaAaTCACTCtCAac  | bacterial magnetic particle formation proteins                                      |
| <i>amb0955</i> | <i>amb0955- mms6</i>                     | -91  | 4.94        | gtTGaGAGTGAtTtGCATg  | bacterial magnetic particle formation proteins                                      |
| <i>amb1424</i> | <i>amb1424- bfd</i>                      | -41  | 4.83        | gATGCGAGTCAtTatCATg  | ?, COG2906: Bacterioferritin-associated ferredoxin                                  |
| <i>amb0936</i> | <i>amb0936-ptr1- COG0348 -chpA2</i>      | -41  | 4.78        | AATtCGAGTCAtTaGCAaa  | High-affinity Fe <sup>2+</sup> transport component and permease, ferredoxin         |
| <i>amb2978</i> | <i>sodC</i>                              | -146 | 4.72        | ctTGCGcGTGAaTCGCATc  | Cu/Zn superoxide dismutase                                                          |
| <i>amb1022</i> | <i>oprB2- feoAB2</i>                     | -42  | 4.69        | gATGCGAGcCAgTCGCAcT  | porin, Fe <sup>2+</sup> transport system                                            |
| <i>amb0940</i> | <i>chpA3-oprB3</i>                       | -2   | <u>4.31</u> | AATGCGtctCACTCtCgTg  | protein involved in high-affinity Fe <sup>2+</sup> transport                        |
| <i>amb2732</i> | <i>feoAB1</i>                            | -33  | <u>4.27</u> | gATGCGAtgCgCTtGCATc  | Fe <sup>2+</sup> transport system                                                   |
| <i>amb3546</i> | <i>X- fepA-exbB-tonB- tolQ -exbD1-ex</i> | -30  | <u>4.2</u>  | gtTGatAaTCAtTCGCAgc  | TonB-dependent receptor, iron transport components                                  |

#### Expression data Iron up-regulated genes (Suzuki et al., 2006)

#### *Magnetospirillum magnetotacticum* MS-1

|                     |                                  |      |             |                     |                                                                 |
|---------------------|----------------------------------|------|-------------|---------------------|-----------------------------------------------------------------|
| <i>Magn03009213</i> | <i>chpA</i>                      | -48  | 5.83        | AtTGCGAGTCACTtGCATT | protein involved in high-affinity Fe <sup>2+</sup> transport    |
| <i>Magn03009755</i> | <i>amb1811</i>                   | -80  | 5.84        | AtTGCGAtTCACTCGCATT | hypothetical protein, predicted transcriptional regulator       |
| <i>Magn03007091</i> | <i>amb1008</i>                   | -38  | 5.45        | gATGCGAGTTgtTCGCAaT | unknown hypothetical short ORF                                  |
| <i>Magn03010317</i> | <i>ptr2</i>                      | -77  | 5.32        | AATGCaAtTCgCTCGCATT | High-affinity Fe <sup>2+</sup> transport permease               |
| <i>Magn03010302</i> |                                  | -90  | 5.02        | ttTGctAtTGACTCGCAaT | Methyl-accepting chemotaxis protein                             |
| <i>Magn03011341</i> | <i>Magn03011341-Magn03011342</i> | -129 | 5.06        | ttTGCGAtcAAtTCGCATT | Predicted Fe-S oxidoreductases                                  |
| <i>Magn03007981</i> | <i>mms6-mms7-mms13</i>           | -174 | 4.94        | cATGCaAaTCACTCtCAac | bacterial magnetic particle formation proteins                  |
| <i>Magn03007982</i> | <i>amb0955- mms6</i>             | -91  | 4.94        | gtTGaGAGTGAtTtGCATg | bacterial magnetic particle formation proteins                  |
| <i>Magn03009364</i> | <i>oprB-feoAB2</i>               | -230 | 4.79        | gATGCGAGcTAaTCGCAcT | porin, Fe <sup>2+</sup> transport system                        |
| <i>Magn03007972</i> | <i>amb0936-ptr1</i>              | -63  | 4.78        | AATtCGAGTCAtTaGCAaa | High-affinity Fe <sup>2+</sup> transport component and permease |
| <i>Magn03007235</i> |                                  | -97  | 4.75        | gtTGCGAtTTAtTtGCAcT | Methyl-accepting chemotaxis protein                             |
| <i>Magn03006859</i> | <i>mxkB</i>                      | -411 | 4.43        | AcTtCGAaTAAaTCTCAaT | siderophore-interacting protein                                 |
| <i>Magn03008031</i> | <i>bfd</i>                       | -51  | <u>4.35</u> | gtTGCGAcTGAtTatCATa | COG2906: Bacterioferritin-associated ferredoxin                 |
| <i>Magn03007374</i> | <i>feoAB</i>                     | -7   | <u>4.27</u> | gATGCGAtgCgCTtGCATc | Fe <sup>2+</sup> transport system                               |

#### *Sphingopyxis alaskensis* RB2256

|                  |              |      |      |                      |                                     |
|------------------|--------------|------|------|----------------------|-------------------------------------|
| <i>Sala_2282</i> | <i>OMP1</i>  | -48  | 4.78 | tTTGCGAATGtTgTCGCAcT | TonB-dependent siderophore receptor |
|                  |              | -8   | 4.84 | gTTGatAATGAaTCGCAaa  |                                     |
| <i>Sala_2061</i> | <i>OMP2</i>  | -63  | 5.19 | AaTGCAcTaATTGCAcT    | TonB-dependent siderophore receptor |
| <i>Sala_1475</i> | <i>OMP3</i>  | 201  | 5    | gTTGCaAtTCgCTCGCAcT  | TonB-dependent siderophore receptor |
| <i>Sala_1279</i> | <i>feoAB</i> | -261 | 5.04 | ATTGatAATCgCTCGCAaa  | Fe <sup>2+</sup> transport system   |

|                                          |                         |      |      |                      |                                                             |
|------------------------------------------|-------------------------|------|------|----------------------|-------------------------------------------------------------|
| Sala_1595                                | <i>hemA</i>             | -118 | 5.52 | AcTGCGAATCgTTCGCAcT  | haem biosynthesis                                           |
| Sala_1122                                | <i>sufS</i> -Sala_1121  | -35  | 5.84 | tTTGCGAATtGTTTCGCAAT | Fe-S cluster assembly, ferredoxin                           |
| Sala_1236                                | <i>iscR-sufBCDSA</i>    | -35  | 5.16 | gTTaaGAATCgTTCGCAAc  | Fe-S cluster assembly                                       |
| Sala_0415                                | <i>bfr</i>              | -354 | 5.19 | AcTGCGAAcCAgTCGCAtc  | bacterioferritin                                            |
|                                          |                         | -329 | 4.85 | gTTGCGAATCtGTCGCAcT  |                                                             |
| Sala_1982                                | <i>fpr</i>              | -189 | 5.01 | ATTGCaAATGAgTtGCACt  | ferredoxin-NADP reductase                                   |
| <b>Parvularcula bermudensis HTCC2503</b> |                         |      |      |                      |                                                             |
| PB2503_04802                             | <i>sdh</i>              | -115 | 5.94 | tTTGCGAATGATTatCAAT  | succinate dehydrogenase                                     |
| PB2503_07374                             | <i>OMP1</i>             | -32  | 5.99 | ATTGaGAATGATTatCAAT  | TonB-dependent siderophore receptor                         |
| PB2503_08524                             | <i>OMP2</i>             | -34  | 5.77 | tTTGCaAgTCATTTCGCAAT | TonB-dependent siderophore receptor                         |
| PB2503_13539                             | <i>fbpCA</i>            | -34  | 5.86 | ATTGaGAAcTATTCGCAaa  | ferric cations ABC transporter                              |
| PB2503_13544                             | <i>fbpB</i>             | -71  | 5.86 | tTTGCGAATagTTCtCAAT  | ferric cations ABC transporter                              |
| PB2503_00005                             | <i>hmuR</i>             | -32  | 5.87 | ATTGaGAgTCATTTCGCAAg | TonB-dependent haemoglobin/transferrin/lactoferrin receptor |
| PB2503_00035                             | <i>hmuTUV</i>           | -99  | 5.81 | AaTGCGAATtATTCGCAta  | hemin ABC transporter                                       |
| PB2503_13529                             | <i>piuC</i>             | -47  | 5.07 | tTTGCaAATGccTCGCAaa  | COG3128 Uncharacterized iron-regulated protein              |
| <b>Oceanicaulis alexandrii HTCC2633</b>  |                         |      |      |                      |                                                             |
| OA2633_01936                             | <i>hemA</i>             | -144 | 4.46 | tTGAGAAgCgTTgTCAag   | haem biosynthesis                                           |
| OA2633_02911                             | <i>nuoABCDEFGHIJLMN</i> | -220 | 4.77 | tTGAGAggCATTcGCAaa   | NADH ubiquinone oxidoreductase                              |
| OA2633_04511                             | <i>OMP1-X-piuC2</i>     | -82  | 4.81 | tCTGcaAtTCATTCTCATT  | TonB-dependent siderophore receptor                         |
| OA2633_05321                             | <i>OMP2</i>             | -38  | 4.54 | AAcGAaAAgCATTCTCATc  | TonB-dependent siderophore receptor                         |
| OA2633_11590                             | <i>piuC</i>             | -26  | 4.73 | ACTGcaAATCAcTCgCAGg  | COG3128 Uncharacterized iron-regulated protein              |
| OA2633_12420                             | <i>bfr</i>              | -103 | 4.75 | tCTGcaAcTCAGtTtTCAGT | bacterioferritin                                            |
| OA2633_12430                             | <i>bfd</i>              | -76  | 4.75 | AtTGcGAATGATTtTCgGa  | COG2906 Bacterioferritin-associated ferredoxin              |
| OA2633_12925                             | <i>OMP3</i>             | -537 | 4.79 | tATGAGAATGATcCgCATT  | TonB-dependent siderophore receptor                         |
| OA2633_08069                             | <i>OMP4-piuB</i>        | -46  | 4.38 | AtTGAtAATCAcTCTCAaa  | TonB-dependent siderophore receptor, iron-uptake factor     |
| OA2633_08249                             | <i>hugA</i>             | -118 | 4.51 | AgTGcGAAaGATTCTCAcT  | TonB-dependent haemoglobin/transferrin/lactoferrin receptor |
|                                          |                         | -64  | 4.5  | AtTGAGAAcTATTCgCAaT  |                                                             |
| OA2633_09259                             | <i>sdh</i>              | -133 | 4.88 | ACTGAGAAcCgTTtGCAaa  | succinate dehydrogenase                                     |
| OA2633_15080                             | <i>fbpABC</i>           | -88  | 4.41 | ctTGcGAgaCgTTCTCAGa  | ferric cations ABC transporter                              |
| OA2633_10854                             |                         | -29  | 4.84 | tTGcGAATGgTTCgCATg   | COG3205:short transmembrane protein                         |
| <b>Pelagibacter ubique HTCC1002</b>      |                         |      |      |                      |                                                             |
| PU1002_00070                             | <i>fbpABC</i>           | -70  | 5.13 | AtTGatAaTCAtTCGCAaT  | ferric cations ABC transporter                              |

**Color code for functional roles of genes:**

**Genes involved in iron uptake**

**Genes involved in iron storage**

**Genes involved in iron utilization pathways (synthesis of Fe-S, heme; iron-containing enzymes)**

**Transcription factors (rirA, araX, fecIR, irr)**

**Genes with other or uncertain functional roles**
