# Supplementary material
Source: PubMed Central journal article supplement (PMC1764042)
Supplement: pcbi.0020163.st007.pdf [file pcbi.0020163.st007.pdf]

Suppl. Table S7. The IscR regulon in alpha-proteobacteria

| Organism                                  | Locus ID      | Operon                  | Position | Score | Site                       |
|-------------------------------------------|---------------|-------------------------|----------|-------|----------------------------|
| <b>Consensus 1:</b>                       |               |                         |          |       | <b>CTTGACgrwwwnnnTCrrr</b> |
| <i>Silicibacter sp.</i>                   | TM1040_1240   | <i>iscR-sufSBCD</i>     | -138     | 5.72  | CTTGACGAATTTtaTCcGG        |
| <i>Silicibacter pomeroyi</i>              | SPO2025       | <i>iscR-sufSBCD</i>     | -140     | 6.09  | CTTGACGAATTCcCTCGGG        |
| <i>Rhodobacter sphaeroides</i>            | RSP_0443      | <i>iscR-sufSBCD</i>     | -120     | 5.13  | CTTGACaAAAaCGcTCgga        |
| <i>Rhodobacter capsulatus</i>             | 001_0477      | <i>iscR-sufSBCD</i>     | -151     | 4.01  | CTTGACCGtcTCGcTCAtG        |
| <i>Roseobacter sp. MED193</i>             | MED193_04321  | <i>iscR-sufSBCD</i>     | -143     | 5.58  | CTTGACGAATTCcaTCaGc        |
| <i>Roseovarius sp.217</i>                 | ROS217_20542  | <i>iscR-sufSBCD</i>     | -119     | 6.09  | CTTGACGAcTTCGCTCGGG        |
| <i>Roseovarius nubinhibens ISM</i>        | ISM_16015     | <i>iscR-sufSBCD</i>     | -148     | 4.55  | CTTGACGgAgcgGCcaGGt        |
| <i>Loktanella vestfoldensis SKA53</i>     | SKA53_05183   | <i>iscR-sufSBCD</i>     | -130     | 5.36  | CTTGACGAAaaCtaTCaGG        |
| <i>Sulfitobacter sp. EE-36</i>            | EE36_14302    | <i>iscR-sufSBCD</i>     | -137     | 5.69  | gTTGACGAATTCGCTaGGG        |
| <i>Oceanicola batsensis HTCC2597</i>      | OB2597_03589  | <i>iscR-sufSBCD</i>     | -133     | 5.12  | CTTGACGAcTTtGgTCaaG        |
| <i>Rhodobacterales bacterium HTCC2654</i> | RB2654_04009  | <i>iscR-sufSBCD</i>     | -144     | 4.52  | CTTGACtggcTaGacCGGG        |
| <i>Pelagibacter ubique HTCC1002</i>       | PU1002_02686  | <i>iscR-sufBCDS-fss</i> | -51      | 4.71  | CTTGACtAATTTtagTCaGG       |
| <i>Rhodospirillum rubrum</i>              | Rrub02002541  | <i>cysE-iscR1-sufS1</i> | -163     | 4.85  | CTTGACcGATTTTcTCGGA        |
| <i>Magnetospirillum magneticum</i>        | amb3031       | <i>cysE-iscR-sufS</i>   | -113     | 5.09  | CTTGACtGGCCTTGTCGGA        |
| <i>Parvularcula bermudensis HTCC2503</i>  | PB2503_09884  | <i>iscR-sufSBCD</i>     | -139     | 3.66  | gTTGACcggAaagGTCgga        |
| <i>Rickettsia conorii</i>                 | RC0732        | <i>iscRSSUA</i>         | -42      | 6.35  | ATTGTAGAtATTAAACAAT        |
| <i>Rickettsia sibirica</i>                | rsib_orf.1360 | <i>iscRSSUA</i>         | -75      | 6.35  | ATTGTAGAtATTAAACAAT        |
| <i>Rickettsia prowazekii</i>              | RP488         | <i>iscRSSUA</i>         | -43      | 5.95  | ATTGTAGAcATaAAACAAT        |
| <b>Consensus 2:</b>                       |               |                         |          |       | <b>tcgGAcyrATtnrGTCynr</b> |
| <i>Erythrobacter litoralis</i>            | ELI0458       | <i>iscR-sufB-..</i>     | -38      | 5.46  | TCGGAacGATTTgGTCCGA        |
| <i>Erythrobacter sp. NAP1</i>             | NAP1_13233    | <i>iscR-sufB-..</i>     | -59      | 5.72  | TCcGACTGATTCAGTCCGA        |
| <i>Novosphingobium aromaticivorans</i>    | Saro02000260  | <i>iscR-sufB-..</i>     | -64      | 5.63  | cCGGAgTGATTCgGTCCGA        |
| <i>Sphinopyxis alaskensis RB2256</i>      | Sala_1236     | <i>iscR-sufB-..</i>     | -53      | 4.74  | gtGGAgTAATTTAcTctag        |
| <i>Zymomonas mobilis</i>                  | ZMO0422       | <i>iscR-sufB-..</i>     | -109     | 5     | TCaGACaAATTTAGTcttg        |
| <i>Gluconobacter oxydans</i>              | GOX0099       | <i>iscR-sufB-..</i>     | -47      | 4.29  | caGGACTtAgcaAGTcttg        |
|                                           | GOX0777       | <i>fssA</i>             | -7       | 4.35  | TCGGACcAATgCAGTCCcg        |
