# Supplementary material
Source: PubMed Central journal article supplement (PMC1764042)

# Supplementary Figure S1.

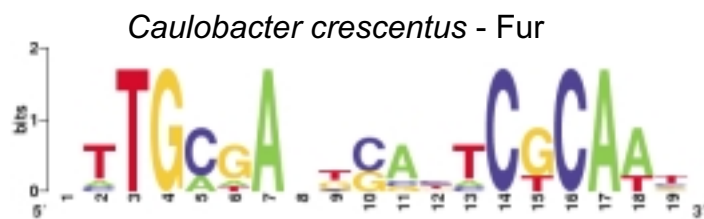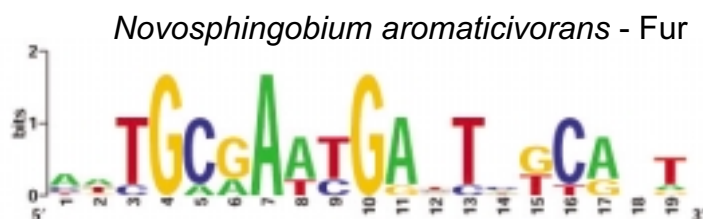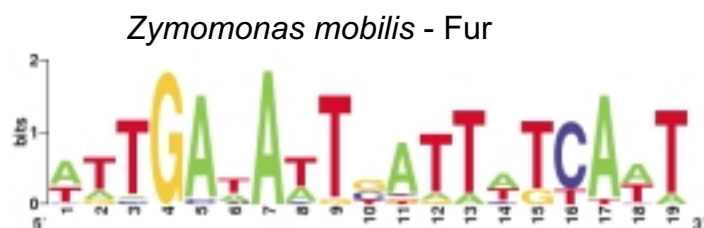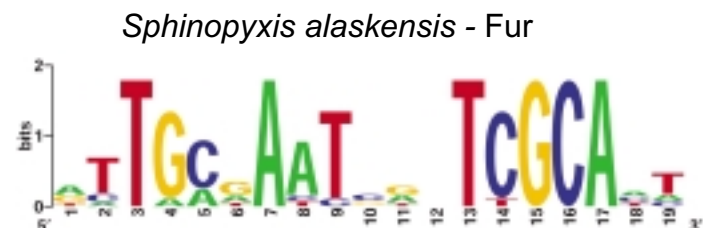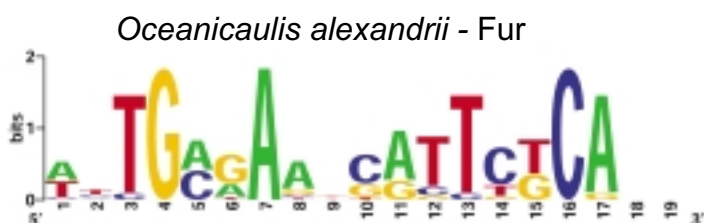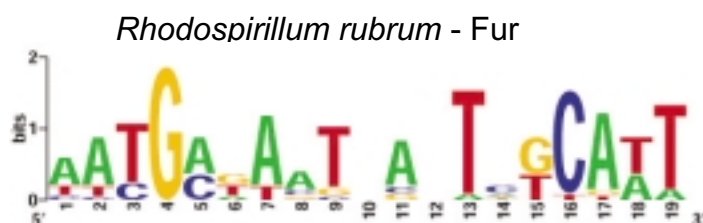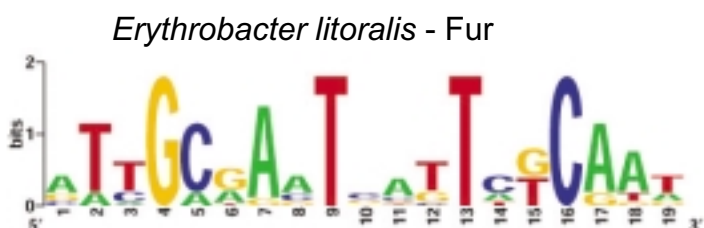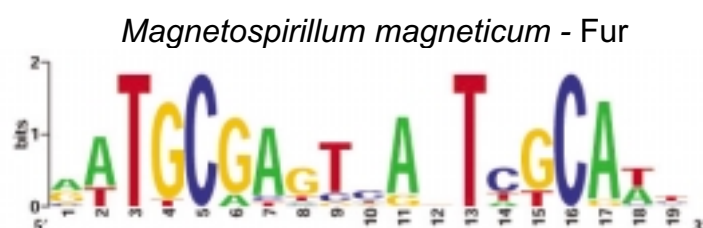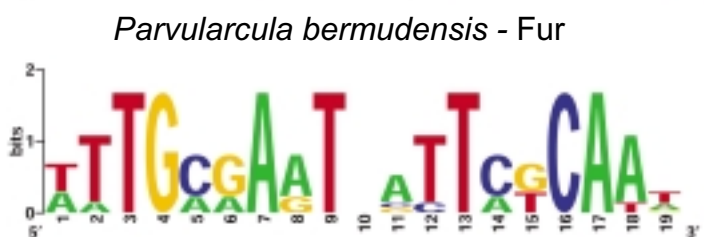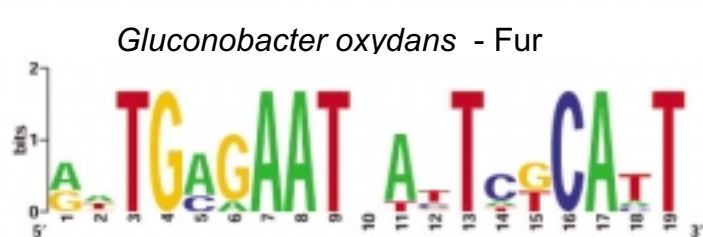

Supplement: pcbi.0020163.sg001.pdf [file pcbi.0020163.sg001.pdf]
